**Article Title:**

**Comparative Immunogenicity, Safety and Efficacy Profiles of four COVID-19 Vaccine types in healthy adults: Systematic Review cum Meta-analysis of Clinical Trial data**

**Authors:**

Si Qi YOONG<sup>a</sup>, Priyanka BHOWMIK<sup>b</sup>, Debprasad DUTTA<sup>c,d,\*</sup>

**Authors Affiliations:**

Si Qi YOONG

<sup>a</sup> Clinical Research Centre

Alice Lee Centre for Nursing Studies

Yong Yoo Lin School of Medicine

National University of Singapore

Singapore 117597

Singapore

Email: [ysq@nus.edu.sg](mailto:ysq@nus.edu.sg)

ORCID: 0000-0003-0102-7793

Priyanka BHOWMIK

<sup>b</sup> Tbilisi State Medical University

T'bilisi 380060

Georgia

Email: [priyankabhowmik96@gmail.com](mailto:priyankabhowmik96@gmail.com)

ORCID: 0000-0001-6567-7934

Debprasad DUTTA

<sup>c</sup> Mazumdar Shaw Center for Translational Research (MSCTR)

Mazumdar Shaw Medical Foundation (MSMF)

Bangalore 560099

India

Email: [debprasad@ms-mf.org](mailto:debprasad@ms-mf.org)

<sup>d</sup> Institute of Infection, Veterinary and Ecological Sciences (IVES)

University of Liverpool

Liverpool L69 7BE

United Kingdom

Email: [debdutta.bio@gmail.com](mailto:debdutta.bio@gmail.com)

ORCID: 0000-0001-5698-3067

**\*Corresponding author:**

Dr Debprasad Dutta, Mazumdar Shaw Center for Translational Research (MSCTR), Mazumdar Shaw Medical Foundation (MSMF), Narayana Health City, Bommasandra Industrial Area, Bangalore 560099, India. Email: [debdutta.bio@gmail.com](mailto:debdutta.bio@gmail.com)

**Word count:** 4159 words

## **Abstract**

Four principal types of authorised COVID-19 vaccines include inactivated whole-virus vaccines, protein subunit vaccines, viral-vector vaccines and nucleic acid (mRNA and DNA) vaccines. Despite numerous Randomised Controlled Trials (RCTs), comprehensive systematic review and comparative meta-analysis have not been performed to validate the immunogenicity, safety and efficacy of COVID-19 vaccines in the healthy adult population. We aim to fulfil this unmet void. We searched for peer-reviewed articles about RCTs of the COVID-19 vaccines on healthy adults (18-64 years) available in eight major bibliographic databases (PubMed, EMBASE, Web of Science, Cochrane Library, Scopus, ScienceDirect, POPLINE, HINARI) till August 28, 2022. The Risk of Bias (RoB) was assessed using the Cochrane RoB-2. Random effects meta-analysis was conducted by pooling dichotomous outcomes using risk ratios (safety outcomes) and continuous outcomes using standardised mean differences (immunogenicity outcomes). Efficacy outcomes were summarised narratively. Moderate to high-quality evidence suggests that those receiving COVID-19 vaccines had significantly higher immune responses compared to placebo. Serious adverse events were rare, confirming that COVID-19 vaccines were safe and immunogenic for the healthy adult population. Remarkably, adverse events were the least common in inactivated vaccines, and nucleic acid vaccines were the most immunogenic. The efficacies of COVID-19 vaccines ranged from 21.9% to 95.9% in preventing COVID-19. We endorse all four types of COVID-19 vaccines for public health policy implementing taskforces. Yet, meta-analyses based on individual patient data are warranted for more extensive measurement of differential impacts of COVID-19 vaccines on different genders, ethnicities, comorbidities and types of vaccine jabbed.

**Keywords:** SARS-CoV-2 vaccines, Efficacy, COVID-19 Immunisation, Adverse Events Following Immunization (AEFI), COVID-19 mass vaccination, Coronavirus vaccine data synthesis

## 1. Introduction

The Coronavirus Disease 2019 (COVID-19) is an infectious respiratory communicable disease caused by Severe Acute Respiratory Syndrome Corona Virus 2 (SARS-CoV-2), originating in Wuhan, China, in early December 2019 [1]. World Health Organization (WHO) announced the outbreak as a global pandemic on March 11, 2020 [2]. COVID-19 is a systemic disease with both short-, intermediate- and long-term physical and mental health impacts [3, 4]. Majority of patients experience mild to moderate symptoms and 5–10% suffer from severe or debilitating disease. Therefore, the development of effective and safe vaccines and novel therapeutics is deemed a global exigency [5].

SARS-CoV-2 belongs to the genus *Betacoronavirus* under the *Coronaviridae* family and has four primary structural proteins, viz. Spike (S), Membrane (M) and Envelope (E) proteins in the viral surface, and Nucleocapsid (N) protein in the ribonucleoprotein core [6]. S proteins bind with a host cell receptor, angiotensin-converting enzyme 2 (ACE2), which is extensively expressed in pulmonary alveolar cells, cardiac myocytes, vascular endothelium and various other cell types, leading to viral invasion [7]. Most COVID-19 vaccines innovated so far have targeted the S protein. S protein consists of a membrane-distal S1 moiety and a membrane-proximal S2 moiety and presents on the viral envelope as a homotrimer (S1-S2 and S2'). The S1 subunit

facilitates ACE2 recognition via its receptor-binding domain (RBD), whereas the S2 subunit enables membrane fusion during viral entry [8].

Four major types of COVID-19 vaccines are in clinical trials and/or have received emergency use authorisation globally: inactivated whole-virus vaccines, protein subunit vaccines, viral vector vaccines and nucleic acid (mRNA and DNA) vaccines. Inactivated whole-virus vaccine candidates contain attenuated SARS-CoV-2 viruses that induce immune responses similar to their real counterparts without causing disease. Protein subunit vaccines contain antigenic parts of the SARS-CoV-2 virus rather than the whole virus to trigger an immune response. Viral vector vaccines utilise modified viruses such as adenoviruses to deliver antigen-encoding genes which encode the surface spike proteins found on the virus and are delivered into human cells. Nucleic acid vaccines contain viral genetic material to provide immunity against the virus particles by encoding the viral antigen [9]. Vaccines offer protection against COVID-19 disease by eliciting both humoral and cellular immune responses [10], which work synergistically to ultimately induce neutralising antibodies crucial for virus clearance by targeting the S protein, thus preventing infection and risk reduction of severe COVID-19 disease [6, 11].

Meta-analyses on immunogenicity, safety and efficacy of COVID-19 vaccine trials among adults published till date have pooled trial data without differentiating between age groups and accounting for comorbidities [12–15], although these covariates markedly influence vaccine efficacy and immune response. With the rapid development of COVID-19 vaccine candidates, clinicians, policymakers and the public at large experienced confusion in deciding which vaccines/vaccine type would be more effective and which would be safer. A multitude of meta-

analyses focused on patient groups with various comorbidities and in the younger population [16–20]. To the best of our knowledge, no meta-analysis has been conducted on the effects of COVID-19 vaccines in the healthy adult population. Due to the rapid development and publication of COVID-19 vaccine trial data, an updated systematic review and meta-analysis is needed. Hence, the current systematic review and meta-analysis aimed to compare the immunogenicity, safety, and efficacy of different types of COVID-19 vaccines in healthy adults.

## **2. Methods**

We reported this systematic review and meta-analysis in accordance with the Preferred Reporting Items for Systematic Reviews and Meta-Analyses (PRISMA) [21]. The protocol was registered on PROSPERO (CRD42022314578).

### **2.1. Study selection criteria**

We included peer-reviewed studies evaluating COVID-19 vaccine candidates irrespective of language and publication date. They must be randomised controlled trials (RCT) (Phase I-IV). Preclinical studies, and those of other study designs (e.g., quasi-experimental, reviews, opinion articles), publication types (e.g., conference abstracts, letters to editor etc.) and non-peer-reviewed articles (e.g., preprints, grey literature) were excluded.

Participants who were non-pregnant, non-lactating, healthy adults (18-64 years old) were included. When RCTs reported data on mixed populations, e.g., those with comorbidities or adults aged 65 years and above, we extracted data concerning only the subgroups of interest to our review. We excluded the trial if less than 90% of participants met the inclusion criteria (e.g.,

studies which mainly recruited participants aged <18 and >64 years old, >10% of participants had comorbidities which put them at risk of severe COVID-19 infection or immunosuppression, e.g., cancer, uncontrolled diabetes, cardiovascular disease, obesity). Given many vaccines are under development, this review focused on vaccines with potential clinical applicability; hence vaccines which ceased further development, or Phase I trials with very small sample sizes (with less than 20 participants in the intervention arm) were excluded unless the vaccine had been investigated in further trials.

In terms of intervention, all four types of COVID-19 vaccine candidates at any RCT phase (nucleic acid, viral vector, inactivated virus, and protein subunit vaccines) were eligible. Comparators were as defined by trials, which included placebo (e.g., saline, vaccine adjuvant or vaccine protecting for other diseases such as meningococcal conjugate vaccine) or no vaccine. However, studies on co-administering different vaccines were excluded, e.g., a COVID-19 vaccine and influenza vaccine.

Studies which evaluated at least one outcome (immunogenicity, safety and/or efficacy) were included in the review. Immunogenicity outcomes included humoral immunity [(geometric mean titres (GMT) and 95% confidence interval (CI)] of anti-RBD IgG, anti-S protein IgG and neutralising antibodies) and cell-mediated immunity (T-cell response). Safety outcomes of COVID-19 vaccine candidates included any adverse events, local, systemic, and serious adverse events. Efficacy outcomes included the number of COVID-19 infections, hospitalisations, ICU admissions, severe illness, and deaths due to COVID-19.

## **2.2. Search strategy**

The detailed search strategy is presented in Supplementary File 1. We systematically searched 8 principal databases (PubMed, EMBASE, Web of Science, Cochrane Library, Scopus, ScienceDirect, POPLINE, HINARI) using keywords such as ‘safety’, ‘immunity’, ‘vaccine efficacy’ and ‘covid 19 vaccine’ for eligible articles on 18-19 April 2022. We also hand-searched the New England Journal of Medicine for relevant articles, as many COVID-19 vaccine RCTs were published in this journal. We searched trial registries (ClinicalTrials.gov, WHO International Clinical Trials Registry Platform) to ensure that all relevant published studies were included. Finally, reference lists of relevant studies and reviews were assessed. Initial search results were uploaded into EndNote X20, where duplicates were removed automatically and manually. Screening of titles and abstracts was done by PB and SQY using Rayyan (<http://rayyan.qcri.org>). They then independently assessed full texts for eligibility. Discrepancies were discussed until a consensus was reached. Given the rapid publication of COVID-19 vaccine trials, we checked regularly for peer-reviewed articles for relevant articles. The final cutoff date for inclusion into the review was August 28, 2022.

## **2.3. Data extraction**

Data were extracted using a pre-piloted data extraction sheet by SQY and PB. Discrepancies were discussed until a consensus was reached. Information extracted includes author, year, country, study design, participant characteristics, vaccine characteristics, type of placebo, immunogenicity, safety, and efficacy outcomes.



## **2.4. Quality appraisal**

Risk of bias (ROB) was independently assessed by PB and SQY for each study using the Revised Risk of Bias tool, and discrepancies were discussed until a consensus was reached [22]. ROB was assessed using 5 domains (bias arising from randomisation process, deviations from intended interventions, missing outcome data, outcome measurement, selection of reported results), and each domain was rated as ‘low risk of bias’, ‘high risk of bias’, or ‘some concerns’. We assessed deviations from interventions based on the effect of assignment to intervention (the intention-to-treat effect). Overall ROB for each study was evaluated accordingly, and ratings were visualised using Robvis [23].

The overall quality of evidence was rated following Grading of Recommendations, Assessment, Development and Evaluations (GRADE) guidelines and justifications were provided in Evidence Profile tables generated using GRADEproGDT software [24].

## **2.5. Synthesis approach**

Meta-analyses were performed using Review Manager Version 5.4.1. The random-effects model was used for all analyses as it accounts for between-study heterogeneity. Meta-analysis was conducted only at timepoints which were investigated by 3 or more studies. For immunogenicity outcomes, standardised mean differences (SMD) of log-transformed geometric mean titers were selected as different assays were used, and that meta-analysis of skewed data can be performed using a natural log transformation [25, 26]. When geometric median titers were reported, we

transformed them into geometric means using established formulas if possible [27]. For safety and efficacy outcomes, dichotomous data were pooled using risk ratios (RR) as the effect size. When meta-analysis was not possible (e.g., dissimilar outcomes, timepoints, inadequate data for meta-analysis, only descriptive/graphical data available), outcomes were summarised narratively.

Cochran's Q test and  $I^2$  statistics were used to evaluate heterogeneity. Statistically significant heterogeneity was set at  $p < 0.10$ . Heterogeneity was unimportant when  $I^2 = 0-40\%$ , moderate when  $I^2 = 30-60\%$ , substantial when  $I^2 = 50-90\%$  and considerable when  $I^2 = 75-100\%$ . If there were more than 10 studies in a meta-analysis and significant heterogeneity was found, subgroup and sensitivity analysis were used to investigate sources of heterogeneity [26]. We predefined subgroups to be based on age, sex and vaccine type (nucleic acid, viral vector, inactivated virus and protein subunit vaccines). There was a significant subgroup difference when  $p < 0.10$  [28]. Sensitivity analysis was done by excluding each study. If results remain consistent, they were construed as robust. When results differed, they were treated with caution. If there were more than 10 studies in a meta-analysis, publication bias was assessed using visual inspection of funnel-plot asymmetry, Begg's and Egger's test [26] using Jamovi version 1.6.

### **3. Results**

#### **3.1. Search findings**

The initial search yielded 20482 articles. After the removal of duplicates, 13112 articles were screened using titles and abstracts. Full texts of 113 articles were assessed, and finally, 41 RCTs were included in the systematic review [29–69]. The PRISMA diagram is shown in Figure 1.

### **3.2. Characteristics of included studies**

Studies were published from 2020 to 2022 across 25 countries, most commonly in China (n = 14), US (n = 8) and Japan (n = 5) (Table 1). Forty-one studies on 26 vaccines were included, of which 14 studies were on protein subunit vaccines, 12 on inactivated vaccines, 9 on viral vector vaccines and 6 on nucleic acid vaccines. Most were phase 1-2 RCTs, and there were 6 phase 3 RCTs [35, 42, 47, 54, 57, 65]. There was a total of 118 377 participants, with sample sizes ranging from 15 to 37594.

### **3.3. Risk of bias**

Most studies had some concerns (n = 31) with high ROB, while the rest had low ROB (n = 15). We rated the studies according to the RCT phase if possible; hence the total number does not add up to 41. Studies were rated with some concerns commonly due to the lack of information on allocation sequence concealment, and some studies did not specify the method of randomisation (Figure 2).

### **3.4. GRADE assessment**

Of the 16 outcomes assessed in the meta-analyses, 14 had moderate or high certainty of evidence. Certainty of evidence was downgraded most commonly due to high heterogeneity (inconsistency) and/or insignificant effect sizes (imprecision), and some outcomes were upgraded due to large effect sizes. The detailed GRADE assessment for each outcome is presented in Supplementary File 2.

### **3.5. Synthesis findings**

Subgroup analysis was conducted based on vaccine type only, as age and sex were not possible due to inadequate information reported. Unless otherwise specified, sensitivity analysis confirmed the robustness of the results as the significance of the effect size remained unchanged.

#### **3.5.1. Immunogenicity outcomes**

Cellular immune responses to COVID-19 vaccines are summarised in Table 2. All immunogenicity outcomes in the following meta-analyses refer to the number of days after the completion of the primary vaccine series (either two or three doses).

##### **3.5.1.1. Neutralising antibodies (live virus neutralisation)**

Four studies reported neutralising antibody levels at 7 days after vaccination (n = 281) [34, 38, 44, 67], which was significantly higher in the vaccinated group compared to the control group (SMD = 2.51, 95% CI 1.58-3.44,  $p < 0.00001$ ). Heterogeneity was considerable ( $I^2 = 84\%$ ,  $p = 0.0004$ ) (Figure 3a).

At 14 days after vaccination (n = 1409, 11 studies) [29–31, 34, 38, 39, 43, 45, 46, 67, 68], neutralising antibodies were significantly higher in the vaccinated group than in the control group (SMD = 4.30, 95% CI 3.54-5.07,  $p < 0.00001$ ). Heterogeneity was also considerable ( $I^2 = 94\%$ ,  $p < 0.00001$ ), and there was a significant subgroup difference ( $I^2 = 80.2\%$ ,  $p = 0.02$ ). Protein subunit vaccines induced higher levels of neutralising antibodies (SMD = 5.01, 95% CI

4.10-5.92,  $p < 0.00001$ ) than inactivated vaccines (SMD = 3.39, 95% CI 2.30-4.47,  $p < 0.00001$ ) (Figure 3b). Publication bias is likely as both Begg's ( $p = 0.007$ ) and Egger's test ( $p < 0.001$ ) were significant (Supplementary File 3 Figure S1)

At 28 days after vaccination ( $n = 1494$ , 8 studies) [30, 38, 45, 46, 58, 63, 64, 68], neutralising antibodies were significantly higher in the vaccinated group than in the control group (SMD = 4.70, 95% CI 3.55-5.85,  $p < 0.00001$ ). Heterogeneity was considerable ( $I^2 = 97\%$ ,  $p < 0.00001$ ) (Figure 3c).

### **3.5.1.2. Neutralising antibodies (pseudovirus neutralisation)**

Five studies reported neutralising antibodies at 28 days after vaccination [38, 45, 58, 59, 69], which was significantly higher in the vaccinated group than the control group (SMD = 3.41, 95% CI 2.48-4.34,  $p < 0.00001$ ). Heterogeneity was considerable ( $I^2 = 91\%$ ,  $p < 0.00001$ ) (Figure 3d).

### **3.5.1.3. Anti-RBD IgG**

Log-transformed anti-RBD IgG levels 14 days after vaccination ( $n = 1130$ , 8 studies) [34, 43-46, 58, 67, 69] were also significantly higher in the vaccinated group compared to the control group (SMD = 5.68, 95% CI 3.95-7.42,  $p < 0.00001$ ) with considerable heterogeneity ( $I^2 = 99\%$ ,  $p < 0.00001$ ) (Figure 4a).

Log-transformed anti-RBD IgG levels 28 days after vaccination ( $n = 2326$ , 8 studies) [36, 38, 46, 49, 56, 58, 59, 69] was also significantly higher in the vaccinated group compared to the control group (SMD = 4.31, 95% CI 3.21-5.42,  $p < 0.00001$ ). Heterogeneity was considerable ( $I^2 = 98\%$ ,  $p < 0.00001$ ) (Figure 4b).

### **3.5.1.4. Anti-S IgG**

Three studies reported anti-S IgG levels at 7 days after vaccination (n = 198) [29, 39, 44], and anti-S IgG levels were significantly higher in the vaccinated group than the control group (SMD = 3.71, 95% CI 1.01-6.42, p = 0.007) with considerable heterogeneity ( $I^2 = 96\%$ , p < 0.00001) (Figure 4c).

At 14 days after vaccination (n = 2006, 9 studies) [29–31, 43, 44, 51, 56, 63, 64], pooled SMD for anti-S IgG levels was 5.48 (95% CI 3.66-7.29, p < 0.00001) with considerable heterogeneity ( $I^2 = 99\%$ , p < 0.00001) (Figure 4d).

## **3.5.2 Safety outcomes**

### **3.5.2.1. Seven days after the first dose**

Twelve studies reporting local adverse events seven days after the first dose of a COVID-19 vaccine were included in the meta-analysis (n = 1301) [31–33, 37, 39, 43, 44, 49, 51, 55, 64, 67], and those in the vaccine arm had a significantly higher risk of local adverse events compared to the control (pooled RR = 2.88, 95% CI 1.78-4.67, p < 0.0001). Heterogeneity was substantial ( $I^2 = 71\%$ , p < 0.00001). There was a significant subgroup difference based on vaccine type (p = 0.03,  $I^2 = 65.7\%$ ), and only the inactivated vaccines subgroup showed an insignificant pooled RR of 1.43 (95% CI 0.60-3.41, p = 0.42), indicating that risk of local adverse events was similar between vaccine and control groups (Figure 5a). Publication bias is unlikely as Egger's regression (p = 0.471) and Begg's test (p = 0.638) were insignificant (Supplementary File 3 Figure S2). When the article by Mohraz et al. [44] was excluded during sensitivity analysis, heterogeneity became insignificant ( $I^2 = 17\%$ , p = 0.28).

Ten studies reporting systemic adverse events seven days after the first dose of a COVID-19 vaccine were pooled ( $n = 1144$ ) [31, 32, 37, 43, 44, 49, 51, 55, 64, 67], and the risk of systemic adverse events was similar between vaccine and control groups (pooled RR = 1.30, 95% CI 0.89-1.91,  $p = 0.17$ ). Heterogeneity was substantial ( $I^2 = 63\%$ ,  $p = 0.004$ ). There was also a significant subgroup difference based on vaccine type ( $p = 0.03$ ,  $I^2 = 67.8\%$ ) (Figure 5b). Publication bias is unlikely as Egger's regression ( $p = 0.452$ ) and Begg's test ( $p = 0.484$ ) were insignificant (Supplementary File 3 Figure S3).

#### **3.5.2.1. Seven days after the second dose**

Ten studies reporting local adverse events seven days after the second dose of a COVID-19 vaccine were pooled ( $n = 1193$ ) [31–33, 37, 39, 43, 44, 55, 64, 67]. Similarly, RR was higher in the vaccine group (pooled RR = 2.61, 95% CI 1.38-4.90,  $p = 0.003$ ), and heterogeneity is considerable ( $I^2 = 80\%$ ,  $p < 0.00001$ ). A significant subgroup difference was found ( $p = 0.0003$ ,  $I^2 = 84.2\%$ ), with only inactivated vaccines reporting an insignificant effect size (pooled RR = 1.05, 95% CI 0.48-2.28,  $p = 0.90$ ) (Figure 6a). Publication bias is unlikely as Egger's regression ( $p = 0.608$ ) and Begg's test ( $p = 0.862$ ) were insignificant (Supplementary File 3 Figure S4).

Seven studies reported systemic adverse events seven days after the second dose of a COVID-19 vaccine ( $n = 1005$ ) [31, 32, 37, 43, 55, 64, 67], and the risk ratio was higher in the vaccinated group (pooled RR = 2.24, 95% CI 1.61-3.11,  $p < 0.00001$ ). Heterogeneity was insignificant ( $I^2 = 35\%$ ,  $p = 0.16$ ) (Figure 6b).

### **3.5.2.2. One month after the first dose**

Six studies reporting any adverse events 1 month after the first dose were pooled ( $n = 397$ ) [29, 32–34, 44, 67], and there were no significant differences between groups receiving vaccine or control (pooled RR = 1.04, 95% CI 0.66-1.65,  $p = 0.87$ ). Heterogeneity was moderate ( $I^2 = 48\%$ ,  $p = 0.09$ ) (Figure 7a).

### **3.5.2.3. One month after the second dose**

Seven studies reporting any adverse events 1 month after the second dose were pooled ( $n = 529$ ) [32–34, 44, 61, 62, 67], and there were also no significant differences between the groups receiving vaccine or control (pooled RR = 1.20, 95% CI 0.63-1.73,  $p = 0.34$ ). Heterogeneity was insignificant ( $I^2 = 0\%$ ,  $p = 0.89$ ) (Figure 7b).

### **3.5.2.4. Overall adverse events**

Eight studies reported overall adverse events after 7 days ( $n = 1603$ ) [38, 40, 41, 50, 52, 63, 66, 68], and the risk of adverse events was significantly higher in the vaccinated group (pooled RR = 1.68, 95% CI 1.21-2.34,  $p = 0.002$ ). Heterogeneity was substantial ( $I^2 = 70\%$ ,  $p = 0.0001$ ) (Figure 8a).

Nine studies reported overall adverse events after 1 month ( $n = 2235$ ) [38, 40, 41, 45, 46, 50, 55, 59, 68], and the risk of adverse events was significantly higher in the vaccinated group (pooled RR = 1.19, 95% CI 1.01-1.40,  $p = 0.04$ ). Heterogeneity was insignificant ( $I^2 = 26\%$ ,  $p = 0.17$ ) (Figure 8b).



### **3.5.2.5 Serious adverse events**

Serious adverse events, defined as Grade 3 or worse, were reported in 19 studies [29, 31, 35, 40, 42, 44, 48, 52, 54–57, 59, 60, 63–67]. However, they were rare, and many studies did not specify if these were related to the vaccine. Nonetheless, the studies concluded that the vaccines had an acceptable safety profile.

### **3.5.3. Efficacy outcomes**

Efficacy outcomes were summarised in Table 1, and 6 studies reported efficacy outcomes [35, 42, 47, 54, 57, 65] ranging from 21.9% (95% CI –49.9 to 59.8) against mild-moderate COVID-19 [57] to 95.9% in preventing COVID-19 [65]. However, they were based on previous circulating variants of concern; hence the findings would not be representative of its efficacy in the current COVID-19 situation in which Omicron is the predominant strain, with subvariants such as BA.4 and BA.5 making up most of the world’s COVID-19 cases [70].

## **4. Discussions**

This systematic review and meta-analysis found that the vaccinated individuals had significantly immunogenic to COVID-19 compared to the placebo. Although our meta-analyses confirmed that vaccines induce significantly higher immune responses compared to placebo up to 28 days after completion of the primary vaccination series, this does not necessarily correlate with better disease outcomes [6]. Efficacy outcomes in healthy adults, which were rarely reported in this review, should still be relied upon to assess the clinical utility of a vaccine.

COVID-19 vaccines in healthy adults, as assessed in this review, were relatively safe with minimal serious adverse events, which is consistent with previous large-scale observational studies and reviews [71–74]. Subgroup analyses suggest that inactivated vaccines may result in the lowest risk of adverse events among the four major vaccine genres. Similar incidences of adverse events concur with other observational studies as well [75, 76]. Due to misinformation, there is significant vaccine hesitancy worldwide. This review provides empirical evidence that vaccines are usually safe, countering the misconception-led vaccine hesitancy [77].

All meta-analyses conducted in this review found that immune responses (neutralising antibodies, anti-RBD and anti-S IgG) were significantly higher than the placebo group after vaccination. However, these measures may not all contribute to establishing immunity to COVID-19 infection and reducing the severity of COVID-19 disease [11]. Nonetheless, neutralising antibody levels are predictive of their protective efficacy, and we found that neutralising antibody levels were the highest in the nucleic acid vaccines subgroup (Figure 4D), which correlates to their high efficacy in preventing COVID-19 infection, as established by previous studies [11, 78]. In the context of the current COVID-19 pandemic, it was found that neutralising antibody levels were reduced by at least  $1/10^{\text{th}}$  against the Omicron variant compared to the original strain [11]. Hence, the findings of this outcome should be interpreted with caution as most included studies were conducted when previous strains, such as the Alpha, Beta and Delta strains were more prevalent [79]. Immune responses and actual protection against COVID-19 infection and severe disease would thus be lower in real-world conditions. A large-scale observational study found that homologous primary vaccination with 2 doses of ChAdOx1 nCoV-19, BNT162b2 or mRNA-1273 resulted in vaccine effectiveness of 48.9% (95% CI 39.2

to 57.1), 65.5% (95% CI 63.9-67.0) and 75.1% (95% CI 70.8 to 78.7) respectively at 2-4 weeks against symptomatic disease against the Omicron variant [80].

We have also descriptively summarised the cellular immune responses of COVID-19 vaccines in Table 2, which shows that they predominantly induce a Th1-mediated immune response. Studies included in the review utilised a variety of assays and outcomes; hence meta-analysis was not possible. A recent study performing head-to-head comparisons of the immune responses of those receiving mRNA-1273, BNT162b2, Ad26.COV2.S or NVX-CoV2373 vaccines found that while antibody titers declined over 6 months, memory T cells and B cells were comparatively stable, suggesting that immune memory from vaccination remains intact [81]. T-cell responses also remain robust against the Omicron variant [82], suggesting that while vaccinations may be less effective in preventing infection due to less neutralising antibodies generated against emerging variants, they are still paramount in reducing disease severity through SARS-CoV-2 specific T cells facilitating early recognition of COVID-19 virus and mediating antiviral responses [83]. Recent COVID-19 vaccine research has thus focused on the effectiveness of heterologous and homologous boosters to make up for the natural decay of antibody levels over time [84].

To the best of our knowledge, this is the first systematic review and meta-analysis that focuses on the effects of COVID-19 vaccines in the healthy adult population and provides comprehensive evidence that current vaccines are safe and immunogenic in the healthy adult population, unlike early meta-analyses on COVID-19 vaccines which had pooled outcomes without accounting for the differences in participant characteristics between studies. In addition,

we have included the most recent RCTs which were not included in the latest meta-analyses published [85, 86].

However, our review was not devoid of limitations. First, numerous studies could not be included in the review or be pooled in the meta-analysis as they did not provide subgroup analyses of the RCT results on the healthy adult population. Our meta-analyses thus had relatively small sample sizes, with most included studies being Phase 1 or 2 trials where sample sizes are smaller. Our subgroup analyses should be interpreted with caution as there was an uneven distribution of studies in each subgroup [28]. Second, we only included English language studies and could have missed out on studies in other languages. Third, due to the varied outcomes investigated and poor reporting of information by some studies, some findings could not be included in the meta-analyses (e.g., no 95% CI reported, different timepoints for outcome measurement).

## **5. Conclusions**

Overall, this systematic review and meta-analysis show that COVID-19 vaccines are safe and immunogenic in the healthy adult population. Future individual patient data-driven meta-analyses should be conducted to fully utilise the available RCT data and provide a more comprehensive analysis of the effects of COVID-19 vaccines according to different patient characteristics (e.g., gender, ethnicities, comorbidities). Thorough longitudinal designs calibrating exposure to SARS-CoV-2 vaccine-mediated adaptive immunity in relation to the consequential long-term advantageous and detrimental impact on diverse ethnic populations can

assist in refurbishing preemptive policies against the future occurrence and outbreak of COVID-19.

## Acknowledgements

We would like to thank Ms Zeng Bentuo for her assistance in searching for relevant articles and Dr Liliya Eugenevna Ziganshina for her valuable advice regarding the scoping of this review.

## Declarations

**Funding:** No funding was received from any public, private or non-profit agencies for conducting this systematic review and meta-analysis.

**Competing interests:** The authors declare that they have no known competing financial interests or personal relationships that could have appeared to influence the work reported in this paper.

**Ethics approval:** This is a systematic review and meta-analysis using publicly available data from peer-reviewed articles reposted in bibliographic databases; hence, no ethical approval is needed.

**Author contributions:** All authors attest that they meet the International Committee of Medical Journal Editors (ICMJE) criteria for authorship. Si Qi Yoong: Methodology, Formal analysis, Investigation, Writing – original draft, Writing – review & editing, Visualisation. Priyanka Bhowmik: Conceptualisation, Investigation, Writing – review & editing. Debprasad Dutta: Conceptualisation, Writing – review & editing, Supervision.

## References

- [1] Zhu N, Zhang D, Wang W, et al. A Novel Coronavirus from Patients with Pneumonia in China, 2019. *N Engl J Med* 2020; 382: 727–733.
- [2] World Health Organisation. WHO Director-General’s opening remarks at the media briefing on COVID-19 - 11 March 2020, <https://www.who.int/director->

general/speeches/detail/who-director-general-s-opening-remarks-at-the-media-briefing-on-covid-19---11-march-2020 (2020, accessed 1 September 2022).

- [3] Dutta D. Neurological Impact of Covid-19 Pandemic: Lessons & Cautions. *COVID-19 Pandemic Update* 2020; 73–83.
- [4] Walia N, Lat JO, Tariq R, et al. Post-acute sequelae of COVID-19 and the mental health implications. *Discov Craiova Rom* 2021; 9: e140.
- [5] Terpos E, Trougakos IP, Karalis V, et al. Kinetics of Anti-SARS-CoV-2 Antibody Responses 3 Months Post Complete Vaccination with BNT162b2; A Prospective Study in 283 Health Workers. *Cells* 2021; 10: 1942.
- [6] Pang NY-L, Pang AS-R, Chow VT, et al. Understanding neutralising antibodies against SARS-CoV-2 and their implications in clinical practice. *Mil Med Res* 2021; 8: 47.
- [7] Beyerstedt S, Casaro EB, Rangel ÉB. COVID-19: angiotensin-converting enzyme 2 (ACE2) expression and tissue susceptibility to SARS-CoV-2 infection. *Eur J Clin Microbiol Infect Dis* 2021; 40: 905–919.
- [8] Dai L, Gao GF. Viral targets for vaccines against COVID-19. *Nat Rev Immunol* 2021; 21: 73–82.
- [9] Rahman MdM, Masum MdHU, Wajed S, et al. A comprehensive review on COVID-19 vaccines: development, effectiveness, adverse effects, distribution and challenges. *VirusDisease* 2022; 33: 1–22.
- [10] Jeyanathan M, Afkhami S, Smaill F, et al. Immunological considerations for COVID-19 vaccine strategies. *Nat Rev Immunol* 2020; 20: 615–632.
- [11] Kent SJ, Khoury DS, Reynaldi A, et al. Disentangling the relative importance of T cell responses in COVID-19: leading actors or supporting cast? *Nat Rev Immunol* 2022; 22: 387–397.
- [12] Cheng H, Peng Z, Luo W, et al. Efficacy and Safety of COVID-19 Vaccines in Phase III Trials: A Meta-Analysis. *Vaccines* 2021; 9: 582.
- [13] McDonald I, Murray SM, Reynolds CJ, et al. Comparative systematic review and meta-analysis of reactogenicity, immunogenicity and efficacy of vaccines against SARS-CoV-2. *Npj Vaccines* 2021; 6: 1–14.
- [14] Pormohammad A, Zarei M, Ghorbani S, et al. Efficacy and Safety of COVID-19 Vaccines: A Systematic Review and Meta-Analysis of Randomised Clinical Trials. *Vaccines* 2021; 9: 467.
- [15] Sharif N, Alzahrani KJ, Ahmed SN, et al. Efficacy, Immunogenicity and Safety of COVID-19 Vaccines: A Systematic Review and Meta-Analysis. *Front Immunol* 2021; 12: 714170.

- [16] Chen J-J, Lee TH, Tian Y-C, et al. Immunogenicity Rates After SARS-CoV-2 Vaccination in People With End-stage Kidney Disease: A Systematic Review and Meta-analysis. *JAMA Netw Open* 2021; 4: e2131749.
- [17] Mehrabi Nejad M-M, Moosaie F, Dehghanbanadaki H, et al. Immunogenicity of COVID-19 mRNA vaccines in immunocompromised patients: a systematic review and meta-analysis. *Eur J Med Res* 2022; 27: 23.
- [18] Teh JSK, Coussement J, Neoh ZCF, et al. Immunogenicity of COVID-19 vaccines in patients with hematologic malignancies: a systematic review and meta-analysis. *Blood Adv* 2022; 6: 2014–2034.
- [19] Xu W, Tang J, Chen C, et al. Safety and efficacy of the COVID-19 vaccine in children and/or adolescents: A meta-analysis. *J Infect* 2022; 84: 722–746.
- [20] Chou OHI, Mui J, Chung CT, et al. COVID-19 vaccination and carditis in children and adolescents: a systematic review and meta-analysis. *Clin Res Cardiol* 2022; 111: 1161–1173.
- [21] Page MJ, McKenzie JE, Bossuyt PM, et al. The PRISMA 2020 statement: an updated guideline for reporting systematic reviews. *BMJ* 2021; 372: n71.
- [22] Sterne JAC, Savović J, Page MJ, et al. RoB 2: a revised tool for assessing risk of bias in randomised trials. *BMJ* 2019; 366: 14898.
- [23] McGuinness LA, Higgins JPT. Risk-of-bias VISualization (robvis): An R package and Shiny web app for visualising risk-of-bias assessments. *Res Synth Methods* 2021; 12: 55–61.
- [24] GRADEpro GDT: GRADEpro Guideline Development Tool, <https://www.gradepro.org/> (2022, accessed 1 June 2022).
- [25] Olivier J, Johnson WD, Marshall GD. The logarithmic transformation and the geometric mean in reporting experimental IgE results: what are they and when and why to use them? *Ann Allergy Asthma Immunol* 2008; 100: 333–337.
- [26] Higgins JPT, Thomas J, Chandler J (eds). *Cochrane Handbook for Systematic Reviews of Interventions*. 2nd ed. John Wiley & Sons, <https://blackwells.co.uk/bookshop/product/Cochrane-Handbook-for-Systematic-Reviews-of-Interventions-by-Julian-P-T-Higgins-editor-Cochrane-Collaboration-issuing-body/9781119536628> (2019, accessed 22 December 2022).
- [27] Wan X, Wang W, Liu J, et al. Estimating the sample mean and standard deviation from the sample size, median, range and/or interquartile range. *BMC Med Res Methodol* 2014; 14: 135.
- [28] Richardson M, Garner P, Donegan S. Interpretation of subgroup analyses in systematic reviews: A tutorial. *Clin Epidemiol Glob Health* 2019; 7: 192–198.

- [29] Keech C, Albert G, Cho I, et al. Phase 1–2 Trial of a SARS-CoV-2 Recombinant Spike Protein Nanoparticle Vaccine. *N Engl J Med* 2020; 383: 2320–2332.
- [30] Masuda T, Murakami K, Sugiura K, et al. Safety and immunogenicity of NVX-CoV2373 (TAK-019) vaccine in healthy Japanese adults: Interim report of a phase I/II randomised controlled trial. *Vaccine* 2022; 40: 3380–3388.
- [31] Formica N, Mallory R, Albert G, et al. Different dose regimens of a SARS-CoV-2 recombinant spike protein vaccine (NVX-CoV2373) in younger and older adults: A phase 2 randomised placebo-controlled trial. *PLOS Med* 2021; 18: e1003769.
- [32] Duc Dang A, Dinh Vu T, Hai Vu H, et al. Safety and immunogenicity of an egg-based inactivated Newcastle disease virus vaccine expressing SARS-CoV-2 spike: Interim results of a randomised, placebo-controlled, phase 1/2 trial in Vietnam. *Vaccine* 2022; 40: 3621–3632.
- [33] Pitisuttithum P, Luvira V, Lawpoolsri S, et al. Safety and immunogenicity of an inactivated recombinant Newcastle disease virus vaccine expressing SARS-CoV-2 spike: Interim results of a randomised, placebo-controlled, phase 1 trial. *eClinicalMedicine* 2022; 45: 101323.
- [34] Liao Y, Li Y, Pei R, et al. Safety and immunogenicity of a recombinant interferon-armed RBD dimer vaccine (V-01) for COVID-19 in healthy adults: a randomised, double-blind, placebo-controlled, Phase I trial. *Emerg Microbes Infect* 2021; 10: 1589–1597.
- [35] Hager KJ, Pérez Marc G, Gobeil P, et al. Efficacy and Safety of a Recombinant Plant-Based Adjuvanted Covid-19 Vaccine. *N Engl J Med* 2022; 386: 2084–2096.
- [36] Hernández-Bernal F, Ricardo-Cobas MC, Martín-Bauta Y, et al. Safety, tolerability, and immunogenicity of a SARS-CoV-2 recombinant spike RBD protein vaccine: A randomised, double-blind, placebo-controlled, phase 1-2 clinical trial (ABDALA Study). *eClinicalMedicine* 2022; 46: 101383.
- [37] Iwata S, Sonoyama T, Kamitani A, et al. Phase 1/2 clinical trial of COVID-19 vaccine in Japanese participants: A report of interim findings. *Vaccine* 2022; 40: 3721–3726.
- [38] Meng F-Y, Gao F, Jia S-Y, et al. Safety and immunogenicity of a recombinant COVID-19 vaccine (Sf9 cells) in healthy population aged 18 years or older: two single-center, randomised, double-blind, placebo-controlled, phase 1 and phase 2 trials. *Signal Transduct Target Ther* 2021; 6: 1–11.
- [39] Ryzhikov AB, Б PA, Ryzhikov EA, et al. A single blind, placebo-controlled randomised study of the safety, reactogenicity and immunogenicity of the “EpiVacCorona” Vaccine for the prevention of COVID-19, in volunteers aged 18–60 years (phase I–II). *Russ J Infect Immun* 2021; 11: 283–296.
- [40] Yang S, Li Y, Dai L, et al. Safety and immunogenicity of a recombinant tandem-repeat dimeric RBD-based protein subunit vaccine (ZF2001) against COVID-19 in adults: two



- randomised, double-blind, placebo-controlled, phase 1 and 2 trials. *Lancet Infect Dis* 2021; 21: 1107–1119.
- [41] Guo W, Duan K, Zhang Y, et al. Safety and immunogenicity of an inactivated SARS-CoV-2 vaccine in healthy adults aged 18 years or older: A randomised, double-blind, placebo-controlled, phase 1/2 trial. *eClinicalMedicine* 2021; 38: 101010.
- [42] Al Kaabi N, Zhang Y, Xia S, et al. Effect of 2 Inactivated SARS-CoV-2 Vaccines on Symptomatic COVID-19 Infection in Adults: A Randomised Clinical Trial. *JAMA* 2021; 326: 35–45.
- [43] Ella R, Vadrevu KM, Jogdand H, et al. Safety and immunogenicity of an inactivated SARS-CoV-2 vaccine, BBV152: a double-blind, randomised, phase 1 trial. *Lancet Infect Dis* 2021; 21: 637–646.
- [44] Mohraz M, Salehi M, Tabarsi P, et al. Safety and immunogenicity of an inactivated virus particle vaccine for SARS-CoV-2, BIV1-CovIran: findings from double-blind, randomised, placebo-controlled, phase I and II clinical trials among healthy adults. *BMJ Open* 2022; 12: e056872.
- [45] Pan H-X, Liu J-K, Huang B-Y, et al. Immunogenicity and safety of a severe acute respiratory syndrome coronavirus 2 inactivated vaccine in healthy adults: randomised, double-blind, and placebo-controlled phase 1 and phase 2 clinical trials. *Chin Med J (Engl)* 2021; 134: 1289–1298.
- [46] Zhang Y, Zeng G, Pan H, et al. Safety, tolerability, and immunogenicity of an inactivated SARS-CoV-2 vaccine in healthy adults aged 18–59 years: a randomised, double-blind, placebo-controlled, phase 1/2 clinical trial. *Lancet Infect Dis* 2021; 21: 181–192.
- [47] Bueno SM, Abarca K, González PA, et al. Safety and Immunogenicity of an Inactivated Severe Acute Respiratory Syndrome Coronavirus 2 Vaccine in a Subgroup of Healthy Adults in Chile. *Clin Infect Dis* 2021; ciab823.
- [48] Fadlyana E, Rusmil K, Tarigan R, et al. A phase III, observer-blind, randomised, placebo-controlled study of the efficacy, safety, and immunogenicity of SARS-CoV-2 inactivated vaccine in healthy adults aged 18–59 years: An interim analysis in Indonesia. *Vaccine* 2021; 39: 6520–6528.
- [49] Pu J, Yu Q, Yin Z, et al. The safety and immunogenicity of an inactivated SARS-CoV-2 vaccine in Chinese adults aged 18–59 years: A phase I randomised, double-blinded, controlled trial. *Vaccine* 2021; 39: 2746–2754.
- [50] Che Y, Liu X, Pu Y, et al. Randomized, Double-Blinded, Placebo-Controlled Phase 2 Trial of an Inactivated Severe Acute Respiratory Syndrome Coronavirus 2 Vaccine in Healthy Adults. *Clin Infect Dis Off Publ Infect Dis Soc Am* 2021; 73: e3949–e3955.
- [51] Zakarya K, Kutumbetov L, Orynbayev M, et al. Safety and immunogenicity of a QazCovid-in® inactivated whole-virion vaccine against COVID-19 in healthy adults: A single-

- centre, randomised, single-blind, placebo-controlled phase 1 and an open-label phase 2 clinical trials with a 6 months follow-up in Kazakhstan. *eClinicalMedicine* 2021; 39: 101078.
- [52] Sadoff J, Le Gars M, Shukarev G, et al. Interim Results of a Phase 1-2a Trial of Ad26.COV2.S Covid-19 Vaccine. *N Engl J Med* 2021; 384: 1824–1835.
- [53] Stephenson KE, Le Gars M, Sadoff J, et al. Immunogenicity of the Ad26.COV2.S Vaccine for COVID-19. *JAMA* 2021; 325: 1535–1544.
- [54] Sadoff J, Gray G, Vandebosch A, et al. Final Analysis of Efficacy and Safety of Single-Dose Ad26.COV2.S. *N Engl J Med* 2022; 386: 847–860.
- [55] Asano M, Okada H, Itoh Y, et al. Immunogenicity and safety of AZD1222 (ChAdOx1 nCoV-19) against SARS-CoV-2 in Japan: a double-blind, randomised controlled phase 1/2 trial. *Int J Infect Dis* 2022; 114: 165–174.
- [56] Folegatti PM, Ewer KJ, Aley PK, et al. Safety and immunogenicity of the ChAdOx1 nCoV-19 vaccine against SARS-CoV-2: a preliminary report of a phase 1/2, single-blind, randomised controlled trial. *The Lancet* 2020; 396: 467–478.
- [57] Madhi SA, Baillie V, Cutland CL, et al. Efficacy of the ChAdOx1 nCoV-19 Covid-19 Vaccine against the B.1.351 Variant. *N Engl J Med* 2021; 384: 1885–1898.
- [58] Zhu F-C, Guan X-H, Li Y-H, et al. Immunogenicity and safety of a recombinant adenovirus type-5-vectored COVID-19 vaccine in healthy adults aged 18 years or older: a randomised, double-blind, placebo-controlled, phase 2 trial. *The Lancet* 2020; 396: 479–488.
- [59] Zhu F, Jin P, Zhu T, et al. Safety and immunogenicity of a recombinant adenovirus type-5-vectored COVID-19 vaccine with a homologous prime-boost regimen in healthy participants aged 6 years and above: a randomised, double-blind, placebo-controlled, phase 2b trial. *Clin Infect Dis Off Publ Infect Dis Soc Am* 2022; 75: e783–e791.
- [60] Zhu F, Zhuang C, Chu K, et al. Safety and immunogenicity of a live-attenuated influenza virus vector-based intranasal SARS-CoV-2 vaccine in adults: randomised, double-blind, placebo-controlled, phase 1 and 2 trials. *Lancet Respir Med* 2022; 10: 749–760.
- [61] Haranaka M, Baber J, Ogama Y, et al. A randomised study to evaluate safety and immunogenicity of the BNT162b2 COVID-19 vaccine in healthy Japanese adults. *Nat Commun* 2021; 12: 7105.
- [62] Walsh EE, Frenck RW, Falsey AR, et al. Safety and Immunogenicity of Two RNA-Based Covid-19 Vaccine Candidates. *N Engl J Med* 2020; 383: 2439–2450.
- [63] Masuda T, Murakami K, Sugiura K, et al. A phase 1/2 randomised placebo-controlled study of the COVID-19 vaccine mRNA-1273 in healthy Japanese adults: An interim report. *Vaccine* 2022; 40: 2044–2052.

- [64] Chu L, McPhee R, Huang W, et al. A preliminary report of a randomised controlled phase 2 trial of the safety and immunogenicity of mRNA-1273 SARS-CoV-2 vaccine. *Vaccine* 2021; 39: 2791–2799.
- [65] Baden LR, El Sahly HM, Essink B, et al. Efficacy and Safety of the mRNA-1273 SARS-CoV-2 Vaccine. *N Engl J Med* 2021; 384: 403–416.
- [66] Chen G-L, Li X-F, Dai X-H, et al. Safety and immunogenicity of the SARS-CoV-2 ARCoV mRNA vaccine in Chinese adults: a randomised, double-blind, placebo-controlled, phase 1 trial. *Lancet Microbe* 2022; 3: e193–e202.
- [67] Shu Y-J, He J-F, Pei R-J, et al. Immunogenicity and safety of a recombinant fusion protein vaccine (V-01) against coronavirus disease 2019 in healthy adults: a randomised, double-blind, placebo-controlled, phase II trial. *Chin Med J (Engl)* 2021; 134: 1967–1976.
- [68] Xia S, Zhang Y, Wang Y, et al. Safety and immunogenicity of an inactivated SARS-CoV-2 vaccine, BBIBP-CorV: a randomised, double-blind, placebo-controlled, phase 1/2 trial. *Lancet Infect Dis* 2021; 21: 39–51.
- [69] Song JY, Choi WS, Heo JY, et al. Safety and immunogenicity of a SARS-CoV-2 recombinant protein nanoparticle vaccine (GBP510) adjuvanted with AS03: A randomised, placebo-controlled, observer-blinded phase 1/2 trial. *eClinicalMedicine* 2022; 51: 101569.
- [70] Mahase E. Covid-19: What we know about the BA.4 and BA.5 omicron variants. *BMJ* 2022; 378: o1969.
- [71] Singh A, Khillan R, Mishra Y, et al. The safety profile of COVID-19 vaccinations in the United States. *Am J Infect Control* 2022; 50: 15–19.
- [72] Wu Q, Dudley MZ, Chen X, et al. Evaluation of the safety profile of COVID-19 vaccines: a rapid review. *BMC Med* 2021; 19: 173.
- [73] Kaur RJ, Dutta S, Bhardwaj P, et al. Adverse Events Reported From COVID-19 Vaccine Trials: A Systematic Review. *Indian J Clin Biochem* 2021; 36: 427–439.
- [74] Cai C, Peng Y, Shen E, et al. A comprehensive analysis of the efficacy and safety of COVID-19 vaccines. *Mol Ther* 2021; 29: 2794–2805.
- [75] Al Khames Aga QA, Alkhaffaf WH, Hatem TH, et al. Safety of COVID-19 vaccines. *J Med Virol* 2021; 93: 6588–6594.
- [76] Lounis M, Rais MA, Bencherit D, et al. Side Effects of COVID-19 Inactivated Virus vs. Adenoviral Vector Vaccines: Experience of Algerian Healthcare Workers. *Front Public Health* 2022; 10: 896343.
- [77] Biswas MR, Alzubaidi MS, Shah U, et al. A Scoping Review to Find Out Worldwide COVID-19 Vaccine Hesitancy and Its Underlying Determinants. *Vaccines* 2021; 9: 1243.

- [78] Khoury DS, Cromer D, Reynaldi A, et al. Neutralising antibody levels are highly predictive of immune protection from symptomatic SARS-CoV-2 infection. *Nat Med* 2021; 27: 1205–1211.
- [79] Siddiqui S, Alhamdi HWS, Alghamdi HA. Recent Chronology of COVID-19 Pandemic. *Front Public Health* 2022; 10: 778037.
- [80] Andrews N, Stowe J, Kirsebom F, et al. Covid-19 Vaccine Effectiveness against the Omicron (B.1.1.529) Variant. *N Engl J Med* 2022; 386: 1532–1546.
- [81] Zhang Z, Mateus J, Coelho CH, et al. Humoral and cellular immune memory to four COVID-19 vaccines. *Cell* 2022; 185: 2434-2451.e17.
- [82] Chen Z, Zhang Y, Wang M, et al. Humoral and Cellular Immune Responses of COVID-19 vaccines against SARS-Cov-2 Omicron variant: a systemic review. *Int J Biol Sci* 2022; 18: 4629–4641.
- [83] Agrati C, Carsetti R, Bordoni V, et al. The immune response as a double-edged sword: The lesson learnt during the COVID-19 pandemic. *Immunology* 2022; 167: 287–302.
- [84] Du Y, Chen L, Shi Y. Booster COVID-19 vaccination against the SARS-CoV-2 Omicron variant: A systematic review. *Hum Vaccines Immunother* 2022; 18: 2062983.
- [85] Ghazy RM, Ashmawy R, Hamdy NA, et al. Efficacy and Effectiveness of SARS-CoV-2 Vaccines: A Systematic Review and Meta-Analysis. *Vaccines* 2022; 10: 350.
- [86] Graña C, Ghosn L, Evrenoglou T, et al. Efficacy and safety of COVID-19 vaccines. *Cochrane Database Syst Rev*. Epub ahead of print 2022. DOI: 10.1002/14651858.CD015477.

**Table 1. Characteristics of included studies**

| Author (year)                   | Study design                                                                    | Vaccine information                                                                                                                                                                                                                                                    |                                                                                       |                       |                                               | Baseline participant characteristics                   |                     |                                                          |                                                                           | Outcomes assessed |                                             |              |
|---------------------------------|---------------------------------------------------------------------------------|------------------------------------------------------------------------------------------------------------------------------------------------------------------------------------------------------------------------------------------------------------------------|---------------------------------------------------------------------------------------|-----------------------|-----------------------------------------------|--------------------------------------------------------|---------------------|----------------------------------------------------------|---------------------------------------------------------------------------|-------------------|---------------------------------------------|--------------|
|                                 |                                                                                 | Vaccine description                                                                                                                                                                                                                                                    | Intervention included in systematic review                                            | Placebo               | No. of doses / Route / Duration between doses | Sample size (Male /Female)                             | Age cohort included | Co-morbidities (if any)                                  | History of COVID-19 infection/serostatus                                  | Immunogenicity    | Safety                                      | Efficacy     |
| <b>Protein subunit vaccines</b> |                                                                                 |                                                                                                                                                                                                                                                                        |                                                                                       |                       |                                               |                                                        |                     |                                                          |                                                                           |                   |                                             |              |
| Keech et al. (2020) [29]        | Phase 1-2 study<br>- Study reported phase 1 results (up to day 35)<br>3-arm RCT | NVX-CoV2373<br>- nanoparticle vaccine trimeric full-length SARS-CoV-2 spike glycoprotein and Matrix-M1 adjuvant<br><br>Other arms<br>- B: 25µg rSARS-Cov2 (2 doses)<br>- D: 25µg rSARS-Cov2 + 50µg adjuvant (2 doses)<br>- E: 25µg rSARS-Cov2 + 50µg adjuvant (1 dose) | C: 5µg rSARS-Cov2 + 50µg adjuvant (2 doses) (selected formulation for phase 3 trials) | A: 0.9% normal saline | 2 doses IM deltoid 21 days apart              | A = 23 (11/12)<br><br>C = 29 (13/13)                   | 18-59               | Likely none                                              | No history of COVID-19 infection                                          | ✓                 | ✓                                           | Not assessed |
| Masuda et al. (2022) [30]       | Phase 1/2 study<br>2-arm RCT                                                    | NVX-CoV2373                                                                                                                                                                                                                                                            | 5µg NVX-CoV2373 + Matrix M 50µg                                                       | Saline                | 2 doses IM deltoid 21 days apart              | Intervention = 100 (54/46)<br><br>Placebo = 40 (23/17) | 20-64               | None                                                     | No history of COVID-19 infection                                          | ✓                 | ✗ (not reported for placebo < 65 years old) | Not assessed |
| Formica et al. (2021) [31]      | Phase 2 study<br>5-arm RCT                                                      | NVX-CoV2373<br><br>Other arms<br>- C: 5µg + M1 / placebo<br>- D: 25µg + M1 (2 doses)<br>- E: 25µg + M1 / placebo                                                                                                                                                       | B: 5µg + M1 (2 doses) (selected formulation for phase 3 trials)                       | A: 0.9% NaCl          | 2 doses IM 21 days apart                      | A = 139<br>B = 140                                     | 18-59               | Included those with clinically stable chronic conditions | No history of COVID-19 infection<br><br>Seropositive participant included | ✓                 | ✓                                           | Not assessed |
| Dang et al. (2022) [32]         | Phase 1-2 (interim) study<br>- study reports phase 1 results<br>5-arm RCT       | NDV-HXP-S (COVIVAC)<br>- Inactivated recombinant Newcastle disease virus vaccine expressing SARS-CoV-2 spike<br><br>Other arms<br>- 1µg S<br>- 1µg S + CpG1018<br>- 10µg S                                                                                             | 3µg S (selected formulation for phase 2 trials)                                       | Saline                | 2-dose IM 28 days apart                       | 3µg S = 25 (14/11)<br><br>Placebo = 20 (10/10)         | 18-59               | Likely none                                              | No history of COVID-19 infection<br><br>5 were seropositive               | ✗ (no 95% CI)     | ✓                                           | Not assessed |

|                                  |                                                        |                                                                                                                                                                                         |                                                                                                                                    |                                                                 |                                 |                                                                                            |       |                 |                                                                            |                                                      |                                                      |                                                                             |
|----------------------------------|--------------------------------------------------------|-----------------------------------------------------------------------------------------------------------------------------------------------------------------------------------------|------------------------------------------------------------------------------------------------------------------------------------|-----------------------------------------------------------------|---------------------------------|--------------------------------------------------------------------------------------------|-------|-----------------|----------------------------------------------------------------------------|------------------------------------------------------|------------------------------------------------------|-----------------------------------------------------------------------------|
| Pitisuttithum et al. (2022) [33] | Phase 1 dose-escalation study (interim)<br>6-arm study | NDV-HXP-S<br><br>Other arms<br>- 1 µg S<br>- 1 µg S + 1.5 µg CpG1018 adjuvant                                                                                                           | - 3 µg S (selected formulation for phase 2 trials)<br>- 3 µg S + 1.5 µg CpG1018 adjuvant (selected formulation for phase 2 trials) | Saline                                                          | 2 doses IM 28 days apart        | 3 µg S = 35 (7/28)<br><br>3 µg S + 1.5 µg CpG1018 = 35 (15/20)<br><br>Placebo = 35 (14/21) | 18-59 | Likely none     | No history of COVID-19 infection<br><br>All seronegative at baseline       | ✗ (no placebo)                                       | ✓                                                    | Not assessed                                                                |
| Liao et al. (2021) [34]          | Phase 1<br>4-arm RCT                                   | V-01<br>- recombinant fusion protein vaccine using RBD dimer as antigen (2-dose IM arm)<br>- 0.5ml of vaccine and Al(OH) <sub>3</sub> as adjuvant<br><br>Other arms<br>- 25µg<br>- 50µg | 10µg (selected formulation for phase 3 trials)                                                                                     | Al(OH) <sub>3</sub> in solution buffer identical to the vaccine | 2 doses IM 21 days              | Intervention (10µg) = 24 (6/18)<br><br>Placebo = 18 (10/8)                                 | 18-59 | None            | No history of COVID-19 infection<br><br>All seronegative at baseline       | ✓                                                    | ✓                                                    | Not assessed                                                                |
| Shu et al. (2021) [67]           | Phase 2 study<br>4-arm RCT                             | V-01<br><br>Other arms<br>- V-01 (1-dose): 50µg<br>- V-01 (2-dose): 25µg                                                                                                                | 2-dose 10µg (selected formulation for phase 3 trials)                                                                              | Al(OH) <sub>3</sub> in solution buffer                          | 1-2 doses IM 21 days apart      | 10µg (2-dose) = 120 (56/64)<br><br>Placebo = 40                                            | 18-59 | None            | No history of COVID-19 infection                                           | ✓                                                    | ✓                                                    | Not assessed                                                                |
| Hager et al. (2022) [35]         | Phase 3<br>2-arm RCT                                   | CoVLP+AS03                                                                                                                                                                              | CoVLP+AS03<br>- 3.75µg CoVLP and AS03 adjuvant                                                                                     | 0.5ml phosphate-buffered saline with polysorbate-80             | 2-dose IM deltoid 21 days apart | Intervention : 12074 (6107/5966)<br><br>Control: 12067 (6186/5880)                         | 18-64 | None            | No history of COVID-19 infection<br><br>Seropositive participants included | ✗ (reported but not age and co-morbidity segregated) | ✗ (reported but not age and co-morbidity segregated) | Symptomatic COVID-19 in healthy adults aged 18-64: 68.9% (95% CI 55.0-78.9) |
| Hernandez-Bernal et              | Phase 1-2 study                                        | Abdala<br>- based on recombinant RBD                                                                                                                                                    | 50µg, 0-14-28 days                                                                                                                 | Not specified                                                   | 3-dose IM 14/28 days            | Phase 1 - 50µg = 22                                                                        | 19-54 | well-controlled | No history of COVID-                                                       | ✓                                                    | ✗ (reported but did not                              | Not assessed                                                                |

|                                                                             |                                            |                                                                                                                                                                                                                                                                                                                                               |                                                                                                                                                                                |                                                    |                                                                                                                 |                                                                                                                                                        |       |             |                                                                      |                            |                                     |                               |
|-----------------------------------------------------------------------------|--------------------------------------------|-----------------------------------------------------------------------------------------------------------------------------------------------------------------------------------------------------------------------------------------------------------------------------------------------------------------------------------------------|--------------------------------------------------------------------------------------------------------------------------------------------------------------------------------|----------------------------------------------------|-----------------------------------------------------------------------------------------------------------------|--------------------------------------------------------------------------------------------------------------------------------------------------------|-------|-------------|----------------------------------------------------------------------|----------------------------|-------------------------------------|-------------------------------|
| al. (2022) [36]<br>Cuba (1 hospital)                                        | 3-arm RCT                                  | subunit of spike protein produced in <i>Pichia pastoris</i> yeast, adjuvanted to alumina<br><br>Other arm - 25µg                                                                                                                                                                                                                              | schedule (selected formulation for phase 3 trials)                                                                                                                             |                                                    | apart<br>- phase 1: 0-14-28 days (short schedule) and 0-28-56 days (long schedule)<br>- phase 2: short schedule | (13/9)<br>- Placebo = 22 (11/11)<br><br>Phase 2 (19-54 years old)<br>- 50µg = 151 (75/76)<br>- Placebo = 153 (77/76)                                   |       |             | 19 infection                                                         |                            |                                     | indicate length of follow-up) |
| Iwata et al. (2022) [37]<br>Japan                                           | Phase 1-2 study (interim)<br><br>3-arm RCT | S-268019-b - contains S-910823 antigen, a modified recombinant spike protein of SARS-CoV-2 produced using baculovirus expression system in rhabdovirus- free insect cells, with a squalene-based adjuvant (A-910823) in oil-in-water emulsion)<br><br>Other arm - 5µg S-910823 with A-910823                                                  | 10 µg S-910823 with A-910823 (selected formulation for phase 2/3 trials)                                                                                                       | Saline                                             | 2-doses 21 days apart                                                                                           | - 10 µg S-910823 with A-910823 = 24 (13/11)<br><br>- Placebo = 12 (5/7)                                                                                | 20-64 | None        | No history of infection or previous COVID-19 vaccination             | ✗ (reported but no 95% CI) | ✓                                   | Not assessed                  |
| Meng et al. (2021) [38]<br>China (Taizhou for phase 1, Sheyang for phase 2) | Phase 1 and 2<br><br>4-arm RCT             | Sf9 cells - recombinant COVID-19 vaccine (Sf9 cells) expressing SARS-CoV-2 spike protein RBD - Al(OH)3 adjuvant<br><br>Other arms (Phase 1)<br>- low dose 20µg (0, 28 days)<br>- high dose 40µg (0, 28 days)<br><br>Other arms (Phase 2)<br>- low dose 20µg (0, 21 days)<br>- high dose 40µg (0, 21 days)<br>- low dose 40µg (0, 14, 28 days) | Phase 1 - high dose 40µg (0, 14, 28 days) (selected formulation for phase 3 trials)<br><br>Phase 2 - high dose 40µg (0, 14, 28 days) (selected formulation for phase 3 trials) | Consistent with vaccine except for vaccine antigen | 2-3 IM doses 14-21 days apart                                                                                   | high dose 40µg (0, 14, 28 days)<br>- Phase 1 = 24 (9/15)<br>- Phase 2 = 100 (42/58)<br><br>Placebo:<br>- Phase 1 = 24 (15/9)<br>- Phase 2 = 80 (26/54) | 18-55 | None        | No history of COVID-19 infection<br><br>All seronegative at baseline | ✓                          | ✓                                   | Not assessed                  |
| Song et al. (2022) [69]<br>South Korea (14 centres)                         | Phase 1/2 trial<br><br>5-arm RCT           | GBP510 with/without AS03 - recombinant protein vaccine containing self-assembling, two-component nanoparticles (RBD-16GS-I53-50) displaying RBD of SARS-CoV-2<br><br>Other arms<br>- Group 1: 10µg GBP510+AS03                                                                                                                                | Group 3: 25µg GBP510 + AS03                                                                                                                                                    | Not specified                                      | 2 doses IM 28 days apart                                                                                        | Intervention = 92<br><br>Placebo = 56                                                                                                                  | 19-64 | Likely none | No history of COVID-19 infection                                     | ✓                          | ✗ (reported but not age-segregated) | Not assessed                  |

|                                                                                                                                                         |                                                      |                                                                                                                                                                                       |                                                  |                                  |                                                 |                                                                                                                                                           |       |             |                                  |                            |   |              |  |
|---------------------------------------------------------------------------------------------------------------------------------------------------------|------------------------------------------------------|---------------------------------------------------------------------------------------------------------------------------------------------------------------------------------------|--------------------------------------------------|----------------------------------|-------------------------------------------------|-----------------------------------------------------------------------------------------------------------------------------------------------------------|-------|-------------|----------------------------------|----------------------------|---|--------------|--|
|                                                                                                                                                         |                                                      |                                                                                                                                                                                       | - Group 2: 10µg GBP510<br>- Group 4: 25µg GBP510 |                                  |                                                 |                                                                                                                                                           |       |             |                                  |                            |   |              |  |
| Ryzhikov et al. (2021) [39]                                                                                                                             | Phase 2<br>2-arm RCT                                 | EpiVacCorona<br>- composition of chemically synthesised peptide immunogens of S protein of SARS-CoV-2 coronavirus conjugated to a carrier protein and adsorbed on Al(OH) <sub>3</sub> | 225µg/0.5ml                                      | NaCl 0.9% solution for injection | 2 doses IM deltoid 21 days apart                | n = 86 (43 each arm)<br>- Men 60.5%<br>- Women 39.5%                                                                                                      | 18-60 | Likely none | No history of COVID-19 infection | ✓                          | ✓ | Not assessed |  |
| Russia (Federal State Budgetary Health Institution)                                                                                                     |                                                      |                                                                                                                                                                                       |                                                  |                                  |                                                 |                                                                                                                                                           |       |             | All seronegative at baseline     |                            |   |              |  |
| Yang et al. (2021) [40]                                                                                                                                 | Phase 1 and 2<br>3 (Phase 1) and 6-arm RCT (Phase 2) | ZF001<br>- RBD-dimer protein produced in Chinese hamster ovary cells adjuvanted with Al(OH) <sub>3</sub><br>Other arms<br>- 50 µg                                                     | 25µg (selected formulation)                      | Al(OH) <sub>3</sub> in buffer    | 3 doses IM 30 days apart (selected formulation) | Phase 1<br>- Placebo 3 doses = 10 (5/5)<br>- 25 µg 3 doses = 20 (14/6)<br><br>Phase 2<br>- Placebo 3 doses = 150 (74/76)<br>- 25 µg 3 doses = 150 (71/79) | 18-59 | Likely none | No history of COVID-19 infection | ✗ (reported but no 95% CI) | ✓ | Not assessed |  |
| China - Phase 1 (2 university hospitals in Chongqing and Beijing)<br>- Phase 2 (Hunan Provincial Centre for Disease Control and Prevention in Xiangtan) |                                                      |                                                                                                                                                                                       |                                                  |                                  |                                                 |                                                                                                                                                           |       |             |                                  |                            |   |              |  |

**Inactivated vaccines**

|                        |                                                                  |                                                                                                                                                                                                                                                                                                                                   |                                                                      |                                                     |                                                                    |                                                                                                                                                                             |       |                         |                              |                |   |              |
|------------------------|------------------------------------------------------------------|-----------------------------------------------------------------------------------------------------------------------------------------------------------------------------------------------------------------------------------------------------------------------------------------------------------------------------------|----------------------------------------------------------------------|-----------------------------------------------------|--------------------------------------------------------------------|-----------------------------------------------------------------------------------------------------------------------------------------------------------------------------|-------|-------------------------|------------------------------|----------------|---|--------------|
| Guo et al. (2021) [41] | Phase 1/2 study (ongoing)<br>4 (Phase 1) and 2-arm RCT (Phase 2) | WIV04 (2 or 3 IM doses)<br>- WIV04 strain was isolated from a patient<br>- vaccine was adsorbed to 0.5mg-alum and packed in 0.5ml-sterile phosphate-buffered saline<br>Phase 1 (received doses on day 0, 28, 56)<br>- 2.5µg<br>- 5µg<br>- 10µg<br><br>Phase 2 (received doses on day 0 and 14, or 0 and 21, or 0 and 28)<br>- 5µg | Selected regimen for phase 3 trials: 5µg 2 doses 21 or 28 days apart | Sterile phosphate-buffered saline and alum adjuvant | 3 doses IM 28 days apart<br><br>2 doses IM 14, 21 or 28 days apart | Phase 1<br>- 5µg = 84 (35/49)<br>- Placebo = 84 (29/55)<br><br>Phase 2<br>2 doses 21 days apart<br>- 5µg = 84 (32/52)<br>- Placebo = 28 (9/19)<br><br>2 doses 28 days apart | 18-59 | No severe comorbidities | No history of infection      | ✗ (no placebo) | ✓ | Not assessed |
| China                  |                                                                  |                                                                                                                                                                                                                                                                                                                                   |                                                                      |                                                     |                                                                    |                                                                                                                                                                             |       |                         | All seronegative at baseline |                |   |              |





|                                                                      |                                                |                                                                                                                                                                                                                                                       |                                                                            |                                                                                   |                                                                          |                                                                                                                                                  |       |                                                   |                                                                 |                                               |                                                                           |                                                                                        |
|----------------------------------------------------------------------|------------------------------------------------|-------------------------------------------------------------------------------------------------------------------------------------------------------------------------------------------------------------------------------------------------------|----------------------------------------------------------------------------|-----------------------------------------------------------------------------------|--------------------------------------------------------------------------|--------------------------------------------------------------------------------------------------------------------------------------------------|-------|---------------------------------------------------|-----------------------------------------------------------------|-----------------------------------------------|---------------------------------------------------------------------------|----------------------------------------------------------------------------------------|
| Pan et al. (2021) [45]                                               | Phase 1 and 2                                  | KCONVAC<br>- 19nCov-CDC-Tan-Strain03 isolated from patient<br>- 0.25mg of Al(OH) <sub>3</sub> adjuvant<br><br>Other arm: - 10µg                                                                                                                       | 5µg, 2 doses<br>28 days apart<br>(selected formulation for phase 3 trials) | Al(OH) <sub>3</sub>                                                               | 2 IM doses<br>- phase 1: 14 days apart<br>- phase 2: 14 or 28 days apart | Phase 2<br>- 5µg group = 100 (38/62)<br>- Placebo = 50 (25/25)                                                                                   | 18-59 | None                                              | No history of infection                                         | ✓                                             | ✓                                                                         | Not assessed                                                                           |
| China                                                                | 3-arm RCT                                      |                                                                                                                                                                                                                                                       |                                                                            |                                                                                   |                                                                          |                                                                                                                                                  |       |                                                   | Seronegative at baseline (IgG, IgM)<br>No history of infection  | ✓                                             | ✓                                                                         | Not assessed                                                                           |
| Zhang et al. (2021) [46]                                             | Phase 1/2<br><br>3-arm RCT                     | CoronaVac<br>- inactivated CZ02 strain with Al(OH) <sub>3</sub> adjuvant, phosphate-buffered saline and NaCl<br><br>Other arm: 10µg                                                                                                                   | 3µg 14 or 28 days apart<br>(selected formulation)                          | Al(OH) <sub>3</sub>                                                               | 2 doses IM<br>14 or 28 days apart                                        | 14 days apart<br>- 3µg group = 144 (67/77)<br>- Placebo = 84 (40/44)<br><br>28 days apart<br>- 3µg group = 144 (69/75)<br>- Placebo = 83 (38/45) | 18-59 | None                                              | No history of infection                                         | ✓                                             | ✓                                                                         | Not assessed                                                                           |
| China (Jiangsu Provincial Centre for Disease Control and Prevention) |                                                |                                                                                                                                                                                                                                                       |                                                                            |                                                                                   |                                                                          |                                                                                                                                                  |       |                                                   | Seronegative at baseline (IgG, IgM)                             |                                               |                                                                           |                                                                                        |
| Bueno et al. (2021) [47]                                             | Phase 3 (interim) (subgroup of healthy adults) | CoronaVac                                                                                                                                                                                                                                             | 3µg                                                                        | 0.5ml of aqueous suspension for injection with Al(OH) <sub>3</sub> and excipients | 2 doses IM left deltoid 14 days apart                                    | Intervention = 245<br><br>Control = 152                                                                                                          | 18-59 | Well-controlled chronic conditions included       | No history of infection<br><br>All anti SARS CoV-2 IgG negative | ✗ (only geometric median and 95% CI reported) | ✗ (did not report total/local/systemic adverse events for 7 days/1 month) | Not assessed                                                                           |
| Chile (8 sites)                                                      | 2-arm RCT                                      |                                                                                                                                                                                                                                                       |                                                                            |                                                                                   |                                                                          |                                                                                                                                                  |       |                                                   |                                                                 |                                               |                                                                           |                                                                                        |
| Fadlyana et al. (2021) [48]                                          | Phase 3 (interim)                              | CoronaVac                                                                                                                                                                                                                                             | 3µg/0.5ml dose                                                             | Water for injection in ampoules (0.5ml/dose)                                      | 2 doses IM left deltoid 14 days apart                                    | Intervention = 811 (505/305)<br><br>Control = 809 (541/269)                                                                                      | 18-59 | Excluding serious and uncontrolled co-morbidities | No history of infection<br><br>All seronegative at baseline     | ✗ (only geometric median and 95% CI reported) | ✗ (did not report timepoint)                                              | 65.3% effective in preventing symptomatic infection 14 days after 2 <sup>nd</sup> dose |
| Indonesia                                                            | 2-arm RCT                                      |                                                                                                                                                                                                                                                       |                                                                            |                                                                                   |                                                                          |                                                                                                                                                  |       |                                                   |                                                                 |                                               |                                                                           |                                                                                        |
| Pu et al. (2021) [49]                                                | Phase 1 study                                  | Virus strain (KMS-1) was isolated from patient and has a D614G mutation in the S protein<br>- inactivated viral antigen adsorbed to 0.25mg of Al(OH) <sub>3</sub> adjuvant and suspended in 0.5ml of buffered saline<br><br>Other arms: 50 and 100 EU | 150 EU 14 days apart<br>(selected formulation)                             | Al(OH) <sub>3</sub> in buffer                                                     | 2 IM doses<br>14 or 28 days apart                                        | 0, 14 schedule<br>- 150 EU = 24 (10/14)<br>- Placebo = 24 (14/10)                                                                                | 18-59 | None                                              | Not specified                                                   | ✗ (no 95% CI)                                 | ✓                                                                         | Not assessed                                                                           |
| China                                                                | 4-arm RCT                                      |                                                                                                                                                                                                                                                       |                                                                            |                                                                                   |                                                                          |                                                                                                                                                  |       |                                                   |                                                                 |                                               |                                                                           |                                                                                        |
| Che et al. (2021) [50]                                               | Phase 2 study                                  | KMS-1<br><br>Other arm: 100 EU                                                                                                                                                                                                                        | 150 EU 14 days apart<br>(selected)                                         | Al(OH) <sub>3</sub> in buffer                                                     | 2 IM doses<br>14 or 28 days apart                                        | 0, 14 schedule<br>- 150 EU =                                                                                                                     | 18-59 | Only specified that they were                     | Not specified                                                   | ✗ (no 95% CI)                                 | ✓                                                                         | Not assessed                                                                           |

|                               |                                                                             |                                                                                                                                                                                                                                                                                                                              |                                                                                |                          |                                           |                                                                |       |                                                                 |                                                         |                |                                                      |                                                          |
|-------------------------------|-----------------------------------------------------------------------------|------------------------------------------------------------------------------------------------------------------------------------------------------------------------------------------------------------------------------------------------------------------------------------------------------------------------------|--------------------------------------------------------------------------------|--------------------------|-------------------------------------------|----------------------------------------------------------------|-------|-----------------------------------------------------------------|---------------------------------------------------------|----------------|------------------------------------------------------|----------------------------------------------------------|
| China                         | 3-arm RCT                                                                   |                                                                                                                                                                                                                                                                                                                              | formulation)                                                                   |                          |                                           | 150 (56/94)<br>- Placebo = 75 (33/42)                          |       | healthy                                                         |                                                         |                |                                                      |                                                          |
| Zakarya et al. (2021) [51]    | Phase 1 and Phase 2 study with 6 months follow-up                           | QazCovid-in<br>- virus strain isolated SARS-CoV2/human/KAZ/KZ_Almaty/2020<br>- Al(OH) <sub>3</sub> adjuvant                                                                                                                                                                                                                  | 5µg                                                                            | 0.9% NaCl                | 2 IM deltoid 21 days apart                | Phase 1 - vaccine = 22 (17/5)<br>- placebo = 22 (12/10)        | 18-50 | None                                                            | No history of infection                                 | ✓              | ✓                                                    | Not assessed                                             |
| Kazakhstan                    | 2-arm RCT                                                                   | (only phase 1 study results included as phase 2 has no control)                                                                                                                                                                                                                                                              |                                                                                |                          |                                           |                                                                |       |                                                                 | Seronegative at baseline (IgG, IgM)                     |                |                                                      |                                                          |
| <b>Virus vector vaccines</b>  |                                                                             |                                                                                                                                                                                                                                                                                                                              |                                                                                |                          |                                           |                                                                |       |                                                                 |                                                         |                |                                                      |                                                          |
| Sadoff et al. (2021) [52]     | Phase 1 and 2a (interim) - reported results from cohort 1a, 1b and cohort 3 | Ad26.COVS.2<br>- recombinant, replication-incompetent human adenovirus type 26 vector encoding a full-length, membrane bound SARS-CoV-2 spike glycoprotein spike protein in a prefusion stabilised conformation<br>- low dose (5x10 <sup>10</sup> viral particles/ml)<br>- high dose (1x10 <sup>11</sup> viral particles/ml) | Low + placebo (selected formulation for phase 3 trials: single shot vaccine)   | Not specified            | Single dose or 2 doses IM 56 days apart   | Low dose group = 162 (78/84)<br><br>Placebo group = 82 (49/51) | 18-55 | No                                                              | 2% seropositive                                         | ✗ (no placebo) | ✓                                                    | Not assessed                                             |
| Belgium and US (12 centres)   | 5-arm RCT                                                                   | Other arms<br>- Low + low<br>- high + high<br>- high + placebo<br>- placebo + placebo                                                                                                                                                                                                                                        |                                                                                |                          |                                           |                                                                |       |                                                                 |                                                         |                |                                                      |                                                          |
| Stephenson et al. (2021) [53] | Phase 1b trial (part of Phase 1-2a trial) - reported results from cohort 1b | Ad26.COVS.2<br>- low dose: 5x10 <sup>10</sup> viral particles/ml<br>- high dose: 1x10 <sup>11</sup> viral particles/ml                                                                                                                                                                                                       | - Low + placebo (selected formulation for phase 3 trials: single shot vaccine) | 1ml 0.9% NaCl solution   | 56 days apart or as a single shot vaccine | Low dose group = 10 (5/5)<br><br>Placebo group = 5 (3/2)       | 18-55 | No                                                              | No history of COVID-19 infection                        | ✗ (no 95% CI)  | Not assessed                                         | Not assessed                                             |
| US (medical centre in Boston) | 5-arm RCT                                                                   | Other arms<br>- low + low<br>- high + high<br>- high + placebo (single shot vaccine)<br>- placebo + placebo                                                                                                                                                                                                                  |                                                                                |                          |                                           |                                                                |       |                                                                 | All seronegative at baseline                            |                |                                                      |                                                          |
| Sadoff et al. (2022) [54]     | Final analysis (crossover vaccination occurred in control)                  | Ad26.COVS.2 (single dose IM injection)                                                                                                                                                                                                                                                                                       | 5x10 <sup>10</sup> viral particles                                             | Saline injection (0.5ml) | Single dose IM                            | Intervention = 14564<br><br>Control = 14553                    | 18-59 | Included those with high risk for severe COVID-19, but efficacy | Seropositive individuals included but efficacy analysis | Not assessed   | ✗ (reported but not age and co-morbidity segregated) | Moderate to severe-critical COVID-19 - onset at least 14 |

|                                                                |                                                     |                                                                                                                                                           |                                    |                                           |                          |                                                  |       |                                                                                     |                                                                                           |                |                                            |                                                                                                                                                                                                                                        |
|----------------------------------------------------------------|-----------------------------------------------------|-----------------------------------------------------------------------------------------------------------------------------------------------------------|------------------------------------|-------------------------------------------|--------------------------|--------------------------------------------------|-------|-------------------------------------------------------------------------------------|-------------------------------------------------------------------------------------------|----------------|--------------------------------------------|----------------------------------------------------------------------------------------------------------------------------------------------------------------------------------------------------------------------------------------|
| South Africa, Brazil, Columbia, Argentina, Peru, Chile, Mexico | group) of Phase 3 trial<br>2-arm RCT                |                                                                                                                                                           |                                    |                                           |                          |                                                  |       | for healthy adult population available                                              | included those only seronegative at baseline                                              |                |                                            | days after vaccination:<br>57.0% (95% CI 49.99-63.03)<br>- onset at least 28 days after:<br>55.2% (47.52-61.82)<br><br>Severe-critical COVID-19 - 14 days:<br>69.1% (51.84-80.70)<br>- 28 days:<br>71.9% (54.79-83.12)<br>Not assessed |
| Asano et al. (2022) [55]<br>Japan (5 centres)                  | Phase 1/2 trial<br>2-arm RCT                        | AZD1222 (ChAdOx1 nCoV-19) - replication-deficient simian adenovirus-vectored vaccine encoding the full-length SARS-CoV-2 spike glycoprotein spike protein | 5x10 <sup>10</sup> viral particles | Saline                                    | 2 IM doses 4 weeks apart | Intervention = 96 (71/25)<br>Control = 32 (24/7) | 18-55 | Mild/moderate, well-controlled comorbidities were allowed (23/128 had hypertension) | No history of COVID-19 infection<br>Seronegative at baseline                              | ✗ (no placebo) | ✓                                          | Not assessed                                                                                                                                                                                                                           |
| Folegatti et al. (2020) [56]<br>UK (5 trial sites)             | Phase 1/2 study (preliminary findings)<br>2-arm RCT | AZD1222 (ChAdOx1 nCoV-19)                                                                                                                                 | 5x10 <sup>10</sup> viral particles | Meningococcal conjugate vaccine (MenACWY) | Single IM dose           | Intervention = 533<br>Control = 533              | 18-55 | None                                                                                | No history of COVID-19 infection<br>Some had high-level anti-spike antibodies at baseline | ✓              | ✗ (some received prophylactic paracetamol) | Not assessed                                                                                                                                                                                                                           |

|                                                          |                                            |                                                                                                                         |                                                                                   |                                             |                                     |                                                                             |                            |                                                                                                        |                                                                  |                                 |                                                     |                                                                                                                     |
|----------------------------------------------------------|--------------------------------------------|-------------------------------------------------------------------------------------------------------------------------|-----------------------------------------------------------------------------------|---------------------------------------------|-------------------------------------|-----------------------------------------------------------------------------|----------------------------|--------------------------------------------------------------------------------------------------------|------------------------------------------------------------------|---------------------------------|-----------------------------------------------------|---------------------------------------------------------------------------------------------------------------------|
| Madhi et al. (2021) [57]                                 | Phase 1b-2 study (against B.1.351 variant) | AZD1222 (ChAdOx1 nCoV-19)                                                                                               | 5x10 <sup>10</sup> viral particles                                                | 0.9% NaCl                                   | 2 IM doses deltoid 21-35 days apart | Overall safety population = 1978<br>Seronegative efficacy population = 1206 | 18-64                      | No or well-controlled chronic conditions (hypertension, chronic respiratory condition, diabetes < 10%) | No history of COVID-19 infection<br>Some seropositive            | ✗ (no control group)            | ✗ (did not specify timepoint)                       | Did not show protection against mild-moderate COVID-19 (against B.1.351 variant only): 21.9% (95% CI -49.9 to 59.8) |
| South Africa                                             | 2-arm RCT                                  |                                                                                                                         |                                                                                   |                                             |                                     |                                                                             |                            |                                                                                                        |                                                                  |                                 |                                                     |                                                                                                                     |
| Zhu et al. (2020) [58]                                   | Phase 2 3-arm RCT                          | Ad5-vectored COVID-19 vaccine - replication-defective Ad5 vectors expressing full-length spike gene based on Wuhan-hu-1 | 5x10 <sup>10</sup> viral particles/ml (selected formulation for phase 3 trial)    | Vaccine excipients only, no virus particles | Single dose IM arm                  | 5x10 <sup>10</sup> viral particles = 112<br>Placebo = 112                   | 18-54                      | 5.49% with underlying disease                                                                          | No history of COVID-19 infection                                 | ✓                               | ✗ (not age-segregated)                              | Not assessed                                                                                                        |
| China (single centre in Wuhan, Hubei province)           |                                            | Other arm: 1x10 <sup>11</sup> viral particles/ml                                                                        |                                                                                   |                                             |                                     |                                                                             |                            |                                                                                                        |                                                                  |                                 |                                                     |                                                                                                                     |
| Zhu et al. (2022) [59]                                   | Phase 2b 2-arm RCT                         | Ad5-vectored COVID-19 vaccine                                                                                           | 5x10 <sup>10</sup> viral particles per 0.5ml                                      | Not specified                               | 2 IM doses 56 days apart            | Intervention = 20 (7/13)<br>Control = 10 (5/5)                              | 18-55                      | None                                                                                                   | All seronegative (IgG, IgM) at baseline                          | ✓                               | ✗ (reported adverse events 14 days after each dose) | Not assessed                                                                                                        |
| China (Taizhou, Jiangsu Province)                        |                                            |                                                                                                                         |                                                                                   |                                             |                                     |                                                                             |                            |                                                                                                        |                                                                  |                                 |                                                     |                                                                                                                     |
| Zhu et al. (2022) [60]                                   | Phase 1 and 2 study 2-arm RCT              | dNS-1 RBD - live-attenuated influenza virus-vector                                                                      | 10 <sup>6</sup> plaque-forming units of CA4-dNS1-nCoV-RBD per ml (0.2ml per dose) | IN diluent                                  | 2 doses IN 14 days apart            | Intervention = 51 (23/28)<br>Placebo = 12 (7/5)                             | 18-59 (Phase 1 study only) | Included only those stable chronic diseases                                                            | No history of COVID-19 infection<br>All seronegative at baseline | ✗ (GMT and 95% CI not reported) | ✓                                                   | Not assessed                                                                                                        |
| China (Dongti Center for Disease Control and Prevention) |                                            |                                                                                                                         |                                                                                   |                                             |                                     |                                                                             |                            |                                                                                                        |                                                                  |                                 |                                                     |                                                                                                                     |

**Nucleic acid vaccines**

|                                 |                     |                                                                                                                                                  |      |        |                                  |                                                   |       |                                                |                                  |                                 |   |              |
|---------------------------------|---------------------|--------------------------------------------------------------------------------------------------------------------------------------------------|------|--------|----------------------------------|---------------------------------------------------|-------|------------------------------------------------|----------------------------------|---------------------------------|---|--------------|
| Haranaka et al. (2021) [61]     | Phase 1/2 (ongoing) | BNT162b2 - mRNA drug substance encoding the SARS-CoV-2 spike glycoprotein RBD antigen, formulated with lipids to obtain the RNA-LNP drug product | 30µg | Saline | 2 IM doses deltoid 21 days apart | Intervention = 97 (50/47)<br>Control = 33 (17/17) | 20-64 | Included those with stable preexisting disease | No history of COVID-19 infection | ✗ (GMT and 95% CI not reported) | ✓ | Not assessed |
| Japan (1 hospital and 1 clinic) |                     |                                                                                                                                                  |      |        |                                  |                                                   |       |                                                |                                  |                                 |   |              |

|                           |                               |                                                                                                        |                                                                |               |                                     |                                                        |       |                      |                                         |                                         |                                         |                                                                                 |
|---------------------------|-------------------------------|--------------------------------------------------------------------------------------------------------|----------------------------------------------------------------|---------------|-------------------------------------|--------------------------------------------------------|-------|----------------------|-----------------------------------------|-----------------------------------------|-----------------------------------------|---------------------------------------------------------------------------------|
| Walsh et al. (2020) [62]  | Phase 1                       | BNT162b2<br>- 10µg<br>- 20µg<br>- 100µg                                                                | BNT162b2:<br>30µg<br>(selected formulation for phase 3 trials) | Not specified | 2 IM doses<br>deltoid 21 days apart | 30µg BNT162b2 = 12 (5/7)<br><br>Control = 12 (7/5)     | 18-55 | None                 | No history of COVID-19 infection        | ✗ (no 95% CI)                           | ✓                                       | Not assessed                                                                    |
| US                        |                               | BNT162b1<br>- 10µg<br>- 20µg<br>- 30µg<br>- 100µg                                                      |                                                                |               |                                     |                                                        |       |                      | All seronegative (IgG, IgM) at baseline |                                         |                                         |                                                                                 |
| Masuda et al. (2022) [63] | Phase 1/2 study (interim)     | mRNA-1273                                                                                              | 0.5ml of 100µg of vaccine                                      | Saline        | 2 IM doses 28 days apart            | Intervention = 100 (54/46)<br><br>Placebo = 40 (21/19) | 20-64 | None                 | No history of infection                 | ✓                                       | ✓                                       | Not assessed                                                                    |
| Japan (2 sites)           |                               |                                                                                                        |                                                                |               |                                     |                                                        |       |                      |                                         |                                         |                                         |                                                                                 |
| Chu et al. (2021) [64]    | Phase 2 study                 | mRNA-1273<br>- other arm: 50µg                                                                         | 100µg (selected formulation for phase 3 trials)                | Saline        | 2 doses IM 28 days apart            | 100µg = 100 (47/53)<br><br>Placebo = 100 (40/60)       | 18-55 | Likely none          | No history of infection                 | ✓                                       | ✓                                       | Not assessed                                                                    |
| US (8 sites)              | 3-arm RCT                     |                                                                                                        |                                                                |               |                                     |                                                        |       |                      |                                         |                                         |                                         |                                                                                 |
| Baden et al. (2021) [65]  | Phase 3 study                 | mRNA-1273<br>- a LNP-encapsulated mRNA vaccine expressing the pre-fusion-stabilised spike glycoprotein | 0.5ml of 100µg of vaccine                                      | Saline        | 2 doses IM 28 days apart            | Intervention = 8189<br><br>Placebo = 8200              | 18-64 | None                 | No history of infection                 | ✗ (not age and co-morbidity segregated) | ✗ (not age and co-morbidity segregated) | Prevention of COVID-19 in healthy adult population aged 18-64: 95.9% (90-98.3%) |
| US (99 centres)           | 2-arm RCT                     |                                                                                                        |                                                                |               |                                     |                                                        |       |                      | All seronegative at baseline            |                                         |                                         | Not assessed                                                                    |
| Chen et al. (2022) [66]   | Phase 1 dose-escalation study | ARCoV<br>- encodes the SARS-CoV-2 spike glycoprotein RBD                                               | 15 µg (selected formulation for phase 3 trials)                | 0.9% NaCl     | 2 doses IM 28 days apart            | 15 µg = 20 (14/6)<br><br>Placebo = 20 (15/5)           | 18-59 | Hypertension (n = 1) | No history of infection                 | ✗ (no 95% CI)                           | ✓                                       | Not assessed                                                                    |
| China                     |                               | Other arms: 5, 10, 20, 25µg                                                                            |                                                                |               |                                     |                                                        |       |                      | All seronegative at baseline            |                                         |                                         |                                                                                 |

**Abbreviations:** RCT (randomised controlled trial), ✓ (outcome included in the meta-analysis), ✗ (outcome excluded from meta-analysis), IM

(intramuscular), CI (confidence interval), IN (intranasal), GMT (geometric mean titre)

**Table 2. Cellular immune responses of different COVID-19 vaccines**

| Vaccine                         | Author (year)                    | Assay methods                                                                                                                               | Findings                                                                                                                                                                                                                                                                                                                                                                                                                                                                          |
|---------------------------------|----------------------------------|---------------------------------------------------------------------------------------------------------------------------------------------|-----------------------------------------------------------------------------------------------------------------------------------------------------------------------------------------------------------------------------------------------------------------------------------------------------------------------------------------------------------------------------------------------------------------------------------------------------------------------------------|
| <b>Protein Subunit Vaccines</b> |                                  |                                                                                                                                             |                                                                                                                                                                                                                                                                                                                                                                                                                                                                                   |
| <b>NVX-CoV2373</b>              | Keech et al. (2020) [29]         | Intracellular cytokine staining of antigen-specific CD4+ T cells                                                                            | - Adjuvanted regimens induced antigen-specific polyfunctional CD4+ T-cell responses reflected in IFN- $\gamma$ , IL-2 and TNF- $\alpha$ production on spike protein stimulation (strong bias towards Th1 phenotype)<br>- Th2 responses minimal (IL-5 and IL-13 cytokines)                                                                                                                                                                                                         |
| <b>NDV-HXP-S</b>                | Pitisuttithum et al. (2022) [33] | IFN- $\gamma$ , IL-5 using ELI-Spot kit                                                                                                     | IFN- $\gamma$ /IL-5 ratio strongly skewed to Th1 response relative to the prevaccination baseline, suggesting the vaccine-induced T-cell memory capable of an antiviral response                                                                                                                                                                                                                                                                                                  |
| <b>S-268019-b</b>               | Iwata et al. (2022) [37]         | IFN- $\gamma$ , IL-2, IL-4, IL-5 in CD4+ or CD8+ cells using intracellular cytokine staining by flow cytometry, IFN- $\gamma$ ELISpot assay | - Both vaccine regimens induced antigen-specific polyfunctional CD4+ T-cell responses reflected in IFN- $\gamma$ , IL-2, IL-4 production on spike protein stimulation<br>- Strong bias towards Th1 phenotype<br>- Th2 responses minimal (IL-4 and IL-5)<br>- Substantial increase in IFN- $\gamma$ levels observed on day 36 and 50 for those receiving vaccine                                                                                                                   |
| <b>Sf9 cells</b>                | Meng et al. (2021) [38]          | Enzyme-linked immunospot (ELISpot)                                                                                                          | - In the phase 1 trial, the positive rate of IFN- $\gamma$ peaked at 14 days than that at 28 days after the last dose vaccination.<br>- Among three vaccine groups, no significant difference was found in the positive rate of IFN- $\gamma$ at 14 days after the last dose vaccination, with 50% in the adult low dose group (0, 28 days), 88% in the adult high dose group (0, 28 days), 88% in the adult high dose group (0, 14, 28 days), and 8% in the adult placebo group. |
| <b>GBP510 with/without AS03</b> | Song et al. (2022) [69]          | Intracellular cytokine staining using SARS-CoV-2 RBD                                                                                        | - GBP510 adjuvanted with AS03 induced stronger CD4+ T-cell responses with higher percentages of IFN-g, TNF-a, and IL-2 expression compared to unadjuvanted GBP510.<br>- IL-4 was inconsistent and IL-5 was nearly inexistent across all groups.                                                                                                                                                                                                                                   |
| <b>Inactivated Vaccines</b>     |                                  |                                                                                                                                             |                                                                                                                                                                                                                                                                                                                                                                                                                                                                                   |
| <b>BBV152</b>                   | Ella et al. (2021) [43]          | - ELISpot<br>- Intracellular cytokine staining                                                                                              | - IFN- $\gamma$ ELISpot responses against SARS-CoV-2 peptides peaked at about 100–120 spot-forming cells per million peripheral blood mononuclear cells in all vaccinated groups on day 28.<br>- The Algel-IMDG groups elicited CD3+, CD4+, and CD8+ T-cell responses that were reflected in the IFN- $\gamma$ production<br>- a minimal detection of less than 0.5% of CD3+, CD4+, and CD8+ T-cell responses in the 6 $\mu$ g with Algel group and the Algel group (placebo).    |

|                                       |                          |                                                                                                                            |                                                                                                                                                                                                                                                                                                                                                                                                                                                                                                                                                                                  |
|---------------------------------------|--------------------------|----------------------------------------------------------------------------------------------------------------------------|----------------------------------------------------------------------------------------------------------------------------------------------------------------------------------------------------------------------------------------------------------------------------------------------------------------------------------------------------------------------------------------------------------------------------------------------------------------------------------------------------------------------------------------------------------------------------------|
| <b>CoronaVac</b>                      | Bueno et al. (2021) [47] | ELISPOT and flow cytometry assays were performed using isolated peripheral blood mononuclear cells (PBMCs).                | <ul style="list-style-type: none"> <li>- Immunisation with CoronaVac induces a T-cell response polarised toward a Th1 immune profile, as the secretion of interleukin-4 by T cells was mainly undetected.</li> <li>- Modest increases in the expression of activation-induced markers were detected for both MP-CD8A and MP-CD8B.</li> </ul>                                                                                                                                                                                                                                     |
| <b>inactivated SARS-CoV-2 vaccine</b> | Pu et al. (2021) [49]    | <ul style="list-style-type: none"> <li>- Human IFN-c ELISpot Kit</li> <li>- Bio-Plex Pro Human Cytokine 48-Plex</li> </ul> | <ul style="list-style-type: none"> <li>- The specific positive cytotoxic T lymphocyte (CTL) responses against the S protein, N protein and virion in the ELISpot assay indicated a distinct increase at day 28 after the booster for both schedules. These results suggest that the vaccine elicits a synchronous dynamic response involving antibodies and CTLs against the viral antigens.</li> <li>- There were no significant differences between the vaccine and placebo groups with regard to the counts of various T cell populations in the peripheral blood.</li> </ul> |

---

**Virus Vector Vaccines**

|                    |                               |                                                                                                                                          |                                                                                                                                                                                                                                                                                                                                                                                                                                                                                                                                                                                                                                                                                                                                                                                                                                                                                                                                                                                                                                                                                                                                                                                                                                                                                                                                                                                                        |
|--------------------|-------------------------------|------------------------------------------------------------------------------------------------------------------------------------------|--------------------------------------------------------------------------------------------------------------------------------------------------------------------------------------------------------------------------------------------------------------------------------------------------------------------------------------------------------------------------------------------------------------------------------------------------------------------------------------------------------------------------------------------------------------------------------------------------------------------------------------------------------------------------------------------------------------------------------------------------------------------------------------------------------------------------------------------------------------------------------------------------------------------------------------------------------------------------------------------------------------------------------------------------------------------------------------------------------------------------------------------------------------------------------------------------------------------------------------------------------------------------------------------------------------------------------------------------------------------------------------------------------|
| <b>Ad26.COVS.S</b> | Sadoff et al. (2021) [52]     | Intracellular cytokine staining with the use of two pools of S-peptide pools of 15 mers overlapping by 11 amino acids                    | <ul style="list-style-type: none"> <li>- In cohort 1a, Th1 response to S peptides was detected in 76% (95% CI 65-86) of low-dose recipients and in 83% (95% CI, 73 to 91) of high-dose recipients; the corresponding values in cohort 3 were 60% (95% CI 46-74) and 67% (95% CI 53-79), respectively.</li> <li>- In cohort 1a, the median CD4+ Th1 response to S peptides increased from an undetectable level at baseline to a median of 0.08% (IQR 0.05-0.16) in low-dose recipients and 0.11% (IQR, 0.07-0.16) in high-dose recipients on day 15; in cohort 3, the corresponding values were 0.09% (IQR 0.04-0.17) and 0.11% (IQR 0.04-0.15), respectively.</li> <li>- S-specific CD8+ T-cell responses, as identified by the expression of interferon-<math>\gamma</math> or interleukin-2 cytokines on S-peptide stimulation. On day 15 in cohort 1a, CD8+ T-cell response was detected in 51% of participants (95% CI 39-63) in the low-dose group and in 64% (95% CI 52-75) in the high-dose group, with a median S-specific CD8+ T-cell response of 0.07% (IQR 0.03-0.19) and 0.09% (IQR, 0.05-0.19), respectively.</li> <li>- In cohort 3, CD8+ T-cell responses were lower, with an incidence of 36% (95% CI 23-51) in the low-dose group and 24% (95% CI 13-37) in the high-dose group, with a median response of 0.06% (IQR 0.02-0.12) and 0.02% (IQR 0.01-0.08), respectively.</li> </ul> |
| <b>Ad26.COVS.S</b> | Stephenson et al. (2021) [53] | <ul style="list-style-type: none"> <li>- IFN-<math>\gamma</math> and IL-4 ELISPOT assays</li> <li>- Multiparameter ICS assays</li> </ul> | <ul style="list-style-type: none"> <li>- IFN-<math>\gamma</math> ELISPOT responses were observed in 65% (13/20) of vaccine recipients by day 15 and in 84% (16/19) of vaccine recipients by day 71, with no significant differences among groups</li> <li>- No IL-4 responses were observed, indicating aTH1-biased cellular immune response.</li> <li>- Multiparameter ICS assays confirmed the</li> </ul>                                                                                                                                                                                                                                                                                                                                                                                                                                                                                                                                                                                                                                                                                                                                                                                                                                                                                                                                                                                            |



|                                      |                              |                                            |                                                                                                                                                                                                                                                                                                                                                                                                                                                                                                                                                                                                                                                                                                                                                                                                                                                                                                                                                                                                                                                                                                                                                                                                                          |
|--------------------------------------|------------------------------|--------------------------------------------|--------------------------------------------------------------------------------------------------------------------------------------------------------------------------------------------------------------------------------------------------------------------------------------------------------------------------------------------------------------------------------------------------------------------------------------------------------------------------------------------------------------------------------------------------------------------------------------------------------------------------------------------------------------------------------------------------------------------------------------------------------------------------------------------------------------------------------------------------------------------------------------------------------------------------------------------------------------------------------------------------------------------------------------------------------------------------------------------------------------------------------------------------------------------------------------------------------------------------|
|                                      |                              |                                            | induction of central memory CD27+/CD45RA-/CD4+ and CD8+ T-cell responses.                                                                                                                                                                                                                                                                                                                                                                                                                                                                                                                                                                                                                                                                                                                                                                                                                                                                                                                                                                                                                                                                                                                                                |
| <b>AZD1222 (ChAdOx1 nCoV-19)</b>     | Folegatti et al. (2020) [56] | Ex-vivo interferon- $\gamma$ ELISpot assay | - Interferon- $\gamma$ ELISpot responses against SARS-CoV-2 spike peptides peaked at 856 spot-forming cells per million peripheral blood mononuclear cells (IQR 493–1802; n=43) at day 14, declining to 424 (221–799; n=43) by day 56 after vaccination.                                                                                                                                                                                                                                                                                                                                                                                                                                                                                                                                                                                                                                                                                                                                                                                                                                                                                                                                                                 |
| <b>AZD1222 (ChAdOx1 nCoV-19)</b>     | Madhi et al. (2021) [57]     | ImmunoSEQ® Assay                           | - The ChAdOx1 nCoV-19 vaccine caused the expansion of CD4+ and CD8+ T lymphocytes to specific epitopes of the spike protein.<br>- D215G mutation found in the B.1.351 variant is within a region that had prevalent T-cell antigen responses                                                                                                                                                                                                                                                                                                                                                                                                                                                                                                                                                                                                                                                                                                                                                                                                                                                                                                                                                                             |
| <b>Ad5-vectored COVID-19 vaccine</b> | Zhu et al. (2020) [58]       | IFN- $\gamma$ ELISpot                      | - Significant activation in postvaccination T-cell responses in terms of spot-forming cells observed both in participants with high and low pre-existing neutralising antibodies at day 28.<br>- Baseline ELISpot T-cell responses were negative in 506 (>99%) of 508 participants. Ad5-vectored COVID-19 vaccine induced significant SARS-CoV-2 spike glycoprotein-specific IFN- $\gamma$ ELISpot responses in 227 (90%, 95% CI 85–93) of 253 participants receiving the $1 \times 10^{11}$ viral particles dose, and 113 (88%, 81–92) of 129 participants receiving the $5 \times 10^{10}$ viral particles dose at day 28.<br>- A median of 11.0 spot-forming cells (IQR 5.0–25.0) and 10.0 spot-forming cells (6.0–21.0) per $1 \times 10^5$ peripheral blood mononuclear cells in participants in the $1 \times 10^{11}$ viral particles and $5 \times 10^{10}$ viral particles dose groups, respectively, were observed at day 28, with increases of more than 10-times in both dose groups.<br>- The IFN- $\gamma$ -ELISpot responses were not significantly different between the dose groups at day 28. - No positive IFN- $\gamma$ ELISpot T-cell responses were detected in the placebo group postvaccination. |
| <b>dNS-1 RBD</b>                     | Zhu et al. (2022) [60]       | INF- $\gamma$ ELISpot                      | - No specific T-cell responses were detected in PBMCs from vaccinators 1 month after the participants had received the second dose.                                                                                                                                                                                                                                                                                                                                                                                                                                                                                                                                                                                                                                                                                                                                                                                                                                                                                                                                                                                                                                                                                      |
| <b>Nucleic Acid Vaccines</b>         |                              |                                            |                                                                                                                                                                                                                                                                                                                                                                                                                                                                                                                                                                                                                                                                                                                                                                                                                                                                                                                                                                                                                                                                                                                                                                                                                          |
| <b>ARCoV</b>                         | Chen et al. (2022) [66]      | ELISpot                                    | - Following the first vaccination, only a small proportion of participants in each vaccine group was positive for IFN- $\gamma$ -expressing cells. However, after the second vaccination, all participants in the 5 $\mu$ g, 10 $\mu$ g, 15 $\mu$ g, and 20 $\mu$ g groups were positive for IFN- $\gamma$ - expressing cells.<br>- All participants were positive with IL-2-expressing cells at day 7 after the second vaccination.                                                                                                                                                                                                                                                                                                                                                                                                                                                                                                                                                                                                                                                                                                                                                                                     |

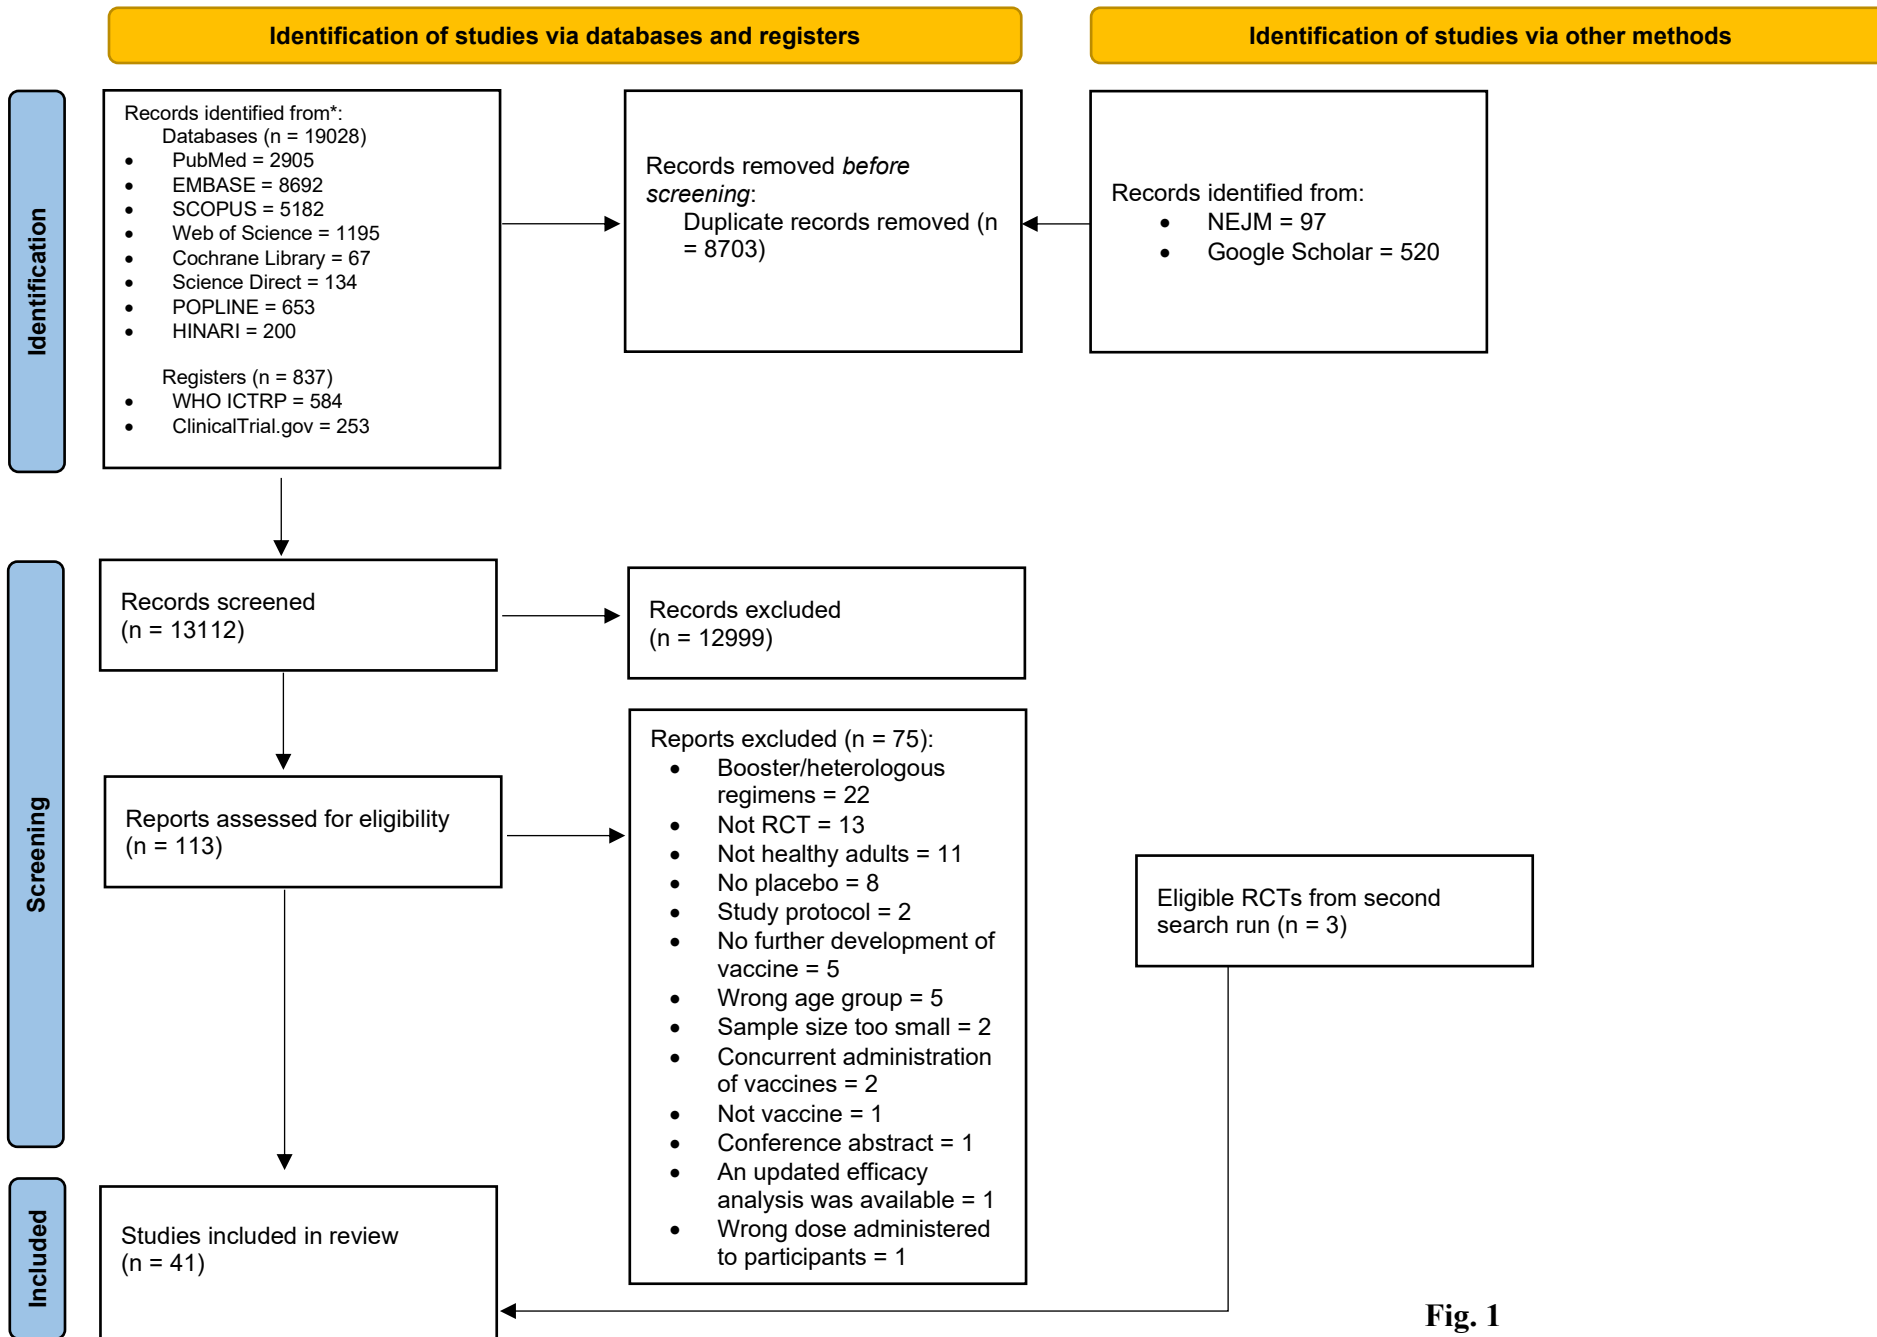

Fig. 1

**a**

| Study                                      | Risk of bias domains |    |    |    |    | Overall |
|--------------------------------------------|----------------------|----|----|----|----|---------|
|                                            | D1                   | D2 | D3 | D4 | D5 |         |
| Asano et al. (2022)                        | +                    | +  | +  | +  | +  | +       |
| Baden et al. (2021)                        | +                    | -  | +  | +  | +  | -       |
| Bueno et al. (2021)                        | -                    | -  | -  | +  | +  | -       |
| Che et al. (2021)                          | ?                    | +  | +  | +  | +  | -       |
| Chen et al. (2022)                         | +                    | +  | +  | +  | +  | +       |
| Chu et al. (2021)                          | +                    | +  | +  | +  | +  | -       |
| Dang et al. (2022)                         | -                    | +  | +  | +  | +  | -       |
| Ella et al. (2021)                         | +                    | -  | +  | +  | -  | -       |
| Fadyana et al. (2021)                      | +                    | -  | +  | +  | -  | -       |
| Folegatti et al. (2020)                    | +                    | +  | +  | +  | +  | +       |
| Formica et al. (2021)                      | -                    | -  | +  | +  | -  | -       |
| Guo et al. (2021)                          | -                    | +  | +  | +  | +  | -       |
| Hager et al. (2022)                        | -                    | -  | +  | +  | +  | -       |
| Haranaka et al. (2021)                     | +                    | +  | +  | +  | +  | +       |
| Hernandez-Bernal et al. (2022)             | +                    | -  | +  | +  | -  | -       |
| Iwata et al. (2022)                        | ?                    | ?  | +  | +  | -  | -       |
| Kaabi et al. (2021) (HB02)                 | +                    | -  | +  | +  | +  | -       |
| Kaabi et al. (2021) (WIV04)                | +                    | -  | +  | +  | +  | -       |
| Keech et al. (2020)                        | -                    | +  | +  | +  | +  | -       |
| Liao et al. (2021)                         | +                    | +  | +  | +  | -  | -       |
| Madhi et al. (2021)                        | +                    | -  | +  | +  | -  | -       |
| Masuda et al. (2022) - mRNA                | -                    | -  | +  | +  | +  | -       |
| Masuda et al. (2022) - protein subunit     | -                    | +  | +  | +  | +  | -       |
| Meng et al. (2021) (Phase 1)               | -                    | +  | +  | +  | -  | -       |
| Meng et al. (2021) (Phase 2)               | -                    | +  | +  | +  | +  | -       |
| Mohraz et al. (2022)                       | +                    | +  | +  | +  | +  | +       |
| Pan et al. (2021) (Phase 1)                | +                    | +  | +  | +  | +  | +       |
| Pan et al. (2021) (Phase 2)                | +                    | +  | +  | +  | +  | +       |
| Pitisuttithum et al. (2022)                | -                    | +  | +  | +  | +  | -       |
| Pu et al. (2021)                           | +                    | +  | +  | +  | -  | -       |
| Ryzhikov et al. (2021)                     | -                    | +  | +  | -  | -  | -       |
| Sadoff et al. (2021)                       | +                    | +  | +  | +  | +  | +       |
| Sadoff et al. (2022)                       | +                    | -  | +  | +  | +  | -       |
| Shu et al. (2021)                          | +                    | +  | +  | +  | -  | -       |
| Song et al. (2022)                         | +                    | +  | +  | +  | +  | +       |
| Stephenson et al. (2021)                   | +                    | +  | +  | +  | +  | +       |
| Walsh et al. (2020)                        | +                    | +  | +  | +  | +  | +       |
| Xia et al. (2021)                          | +                    | +  | +  | +  | +  | +       |
| Yang et al. (2021) (Phase 1)               | +                    | +  | -  | +  | -  | -       |
| Yang et al. (2021) (Phase 2)               | +                    | +  | +  | +  | +  | +       |
| Zakarya et al. (2021)                      | +                    | +  | +  | -  | +  | -       |
| Zhang et al. (2021) (Phase 1)              | -                    | +  | +  | +  | +  | -       |
| Zhang et al. (2021) (Phase 2)              | -                    | -  | +  | +  | +  | -       |
| Zhu et al. (2020)                          | +                    | +  | +  | +  | +  | +       |
| Zhu et al. (2022) - Ad5-vectored           | +                    | -  | +  | +  | +  | -       |
| Zhu et al. (2022) - Influenza virus vector | +                    | +  | +  | +  | +  | +       |

Domains:  
D1: Bias arising from the randomization process.  
D2: Bias due to deviations from intended interventions.  
D3: Bias due to missing outcome data.  
D4: Bias in measurement of the outcome.  
D5: Bias in selection of the reported result.

Judgement  
+ Low  
- Some concerns  
? No information

**b**

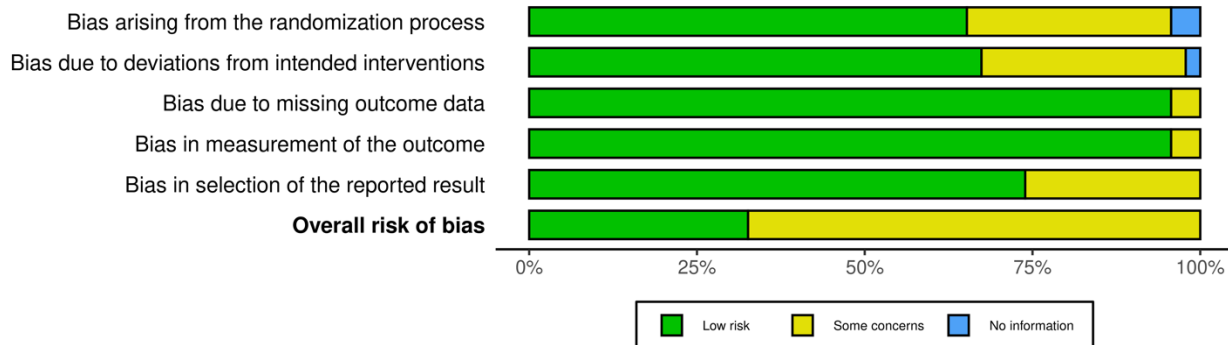

**Fig. 2**

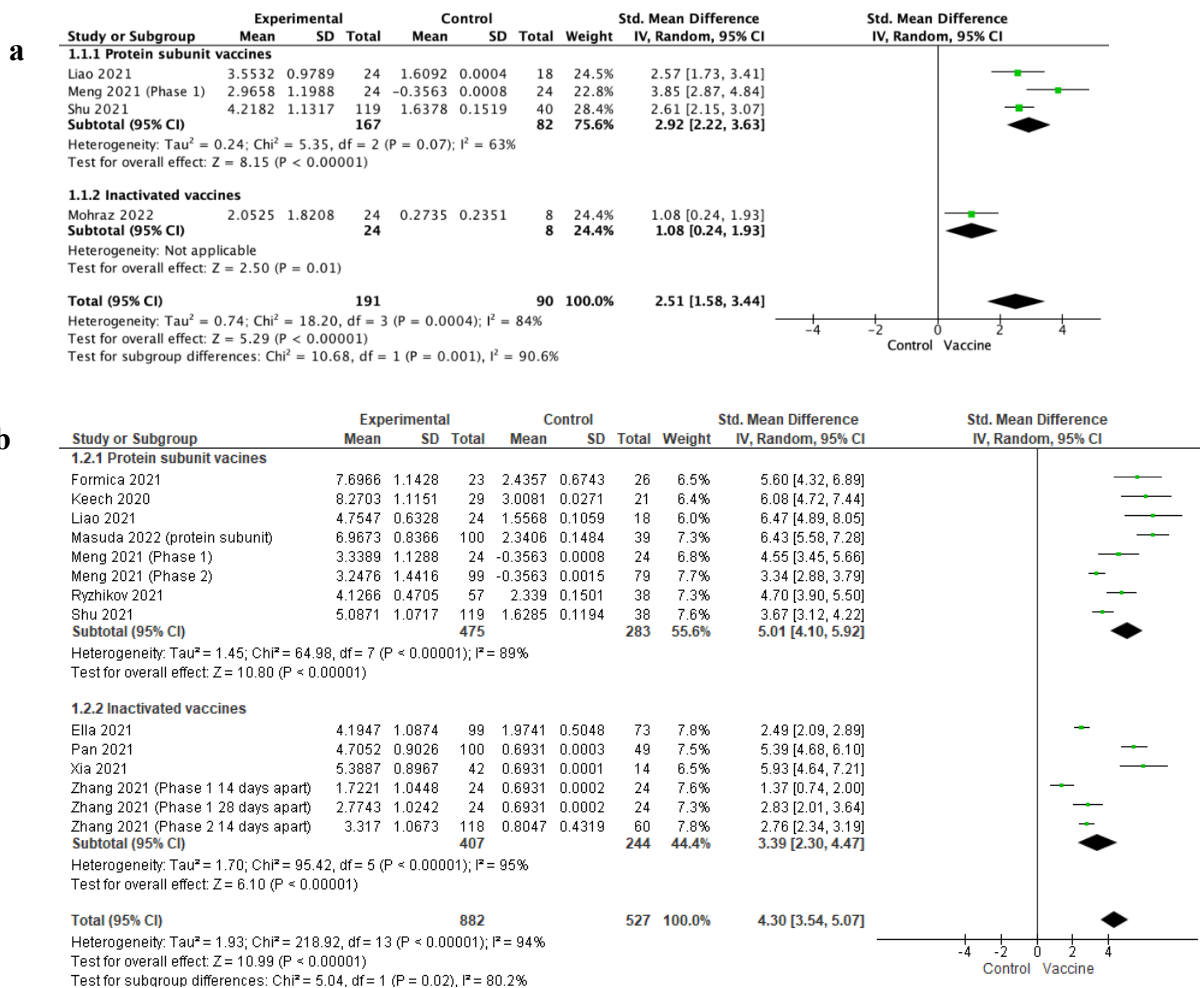

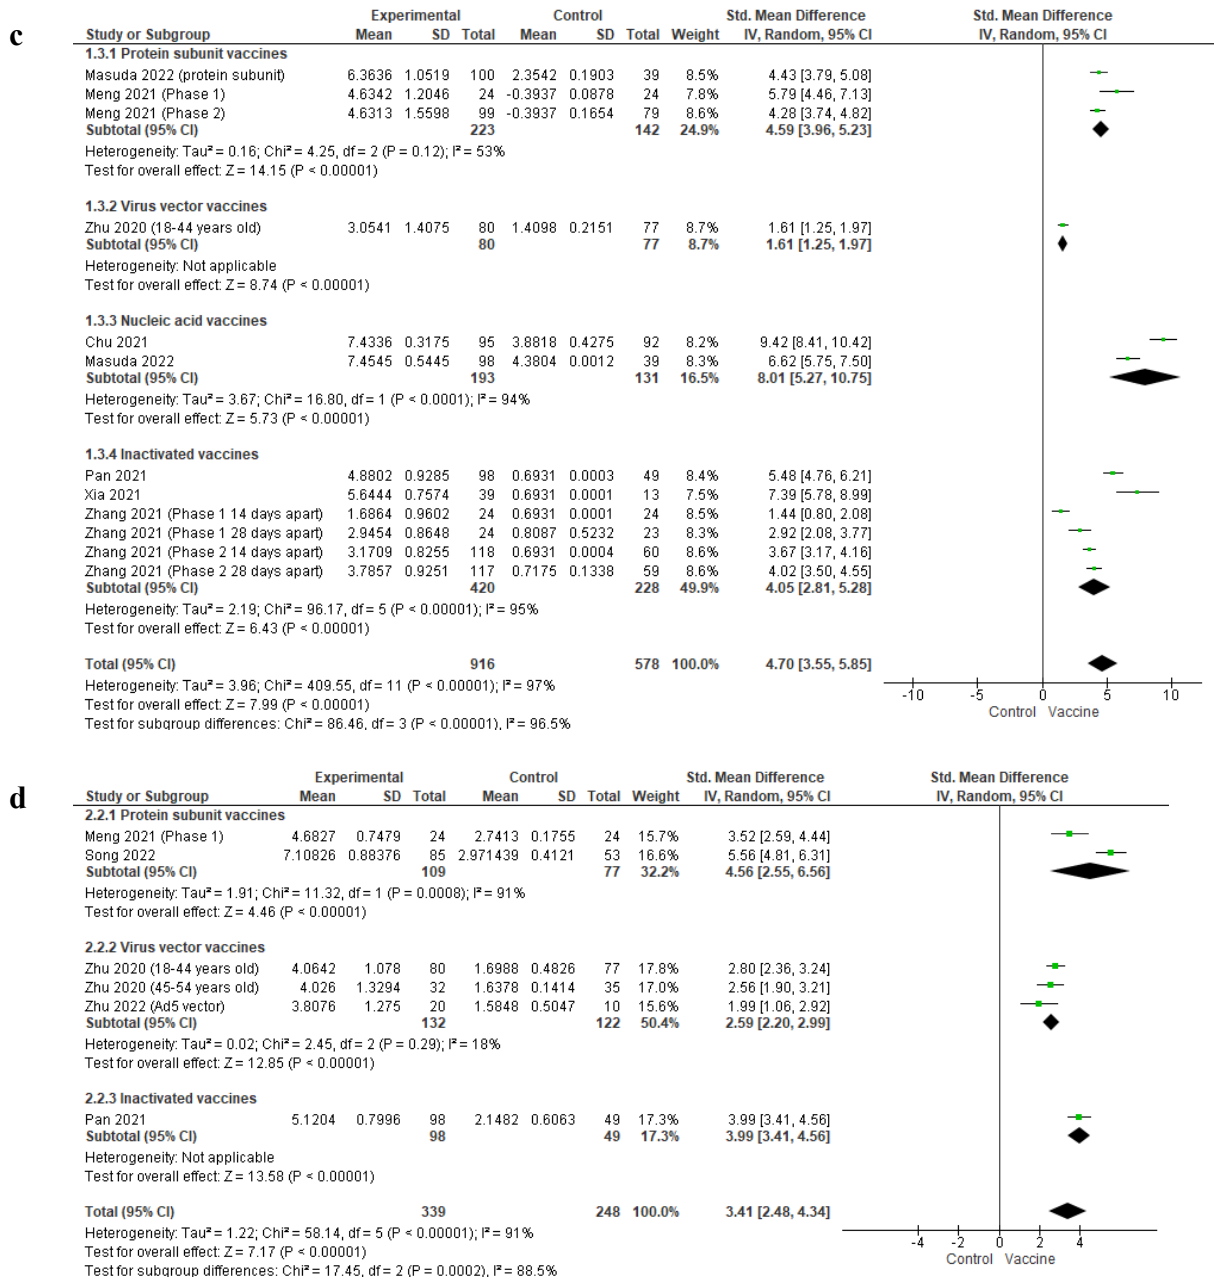

**Fig. 3**

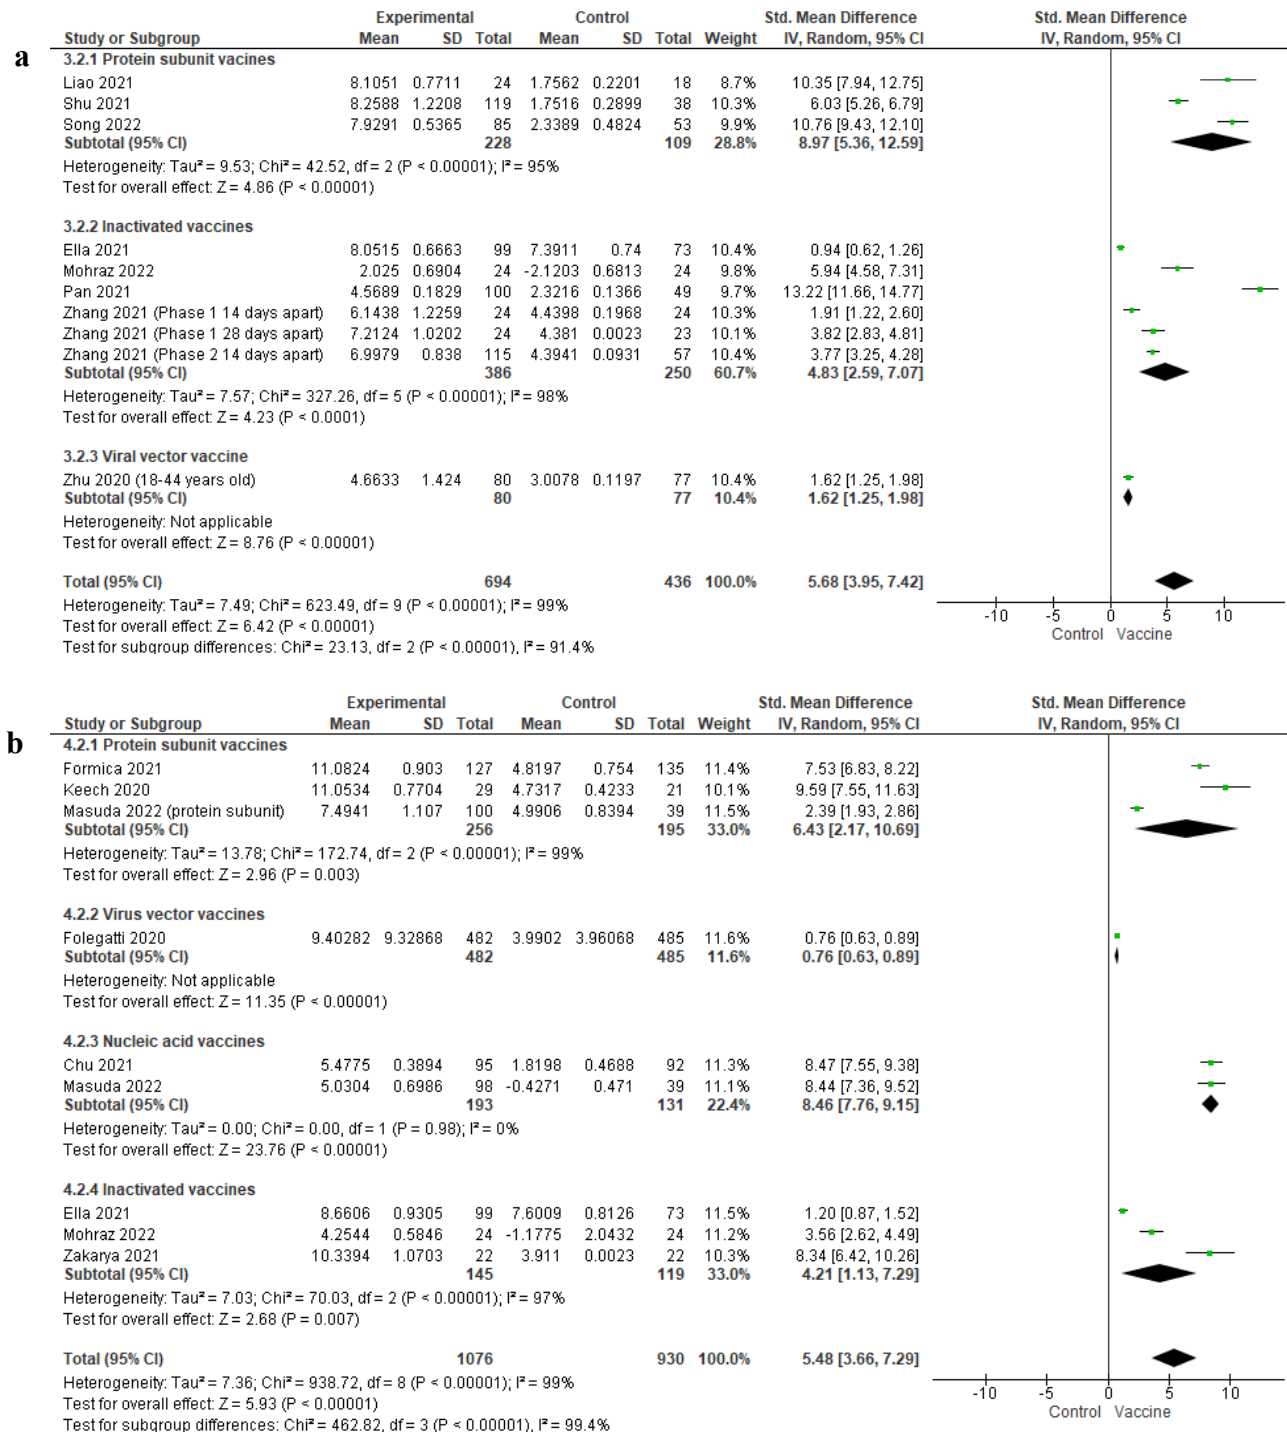

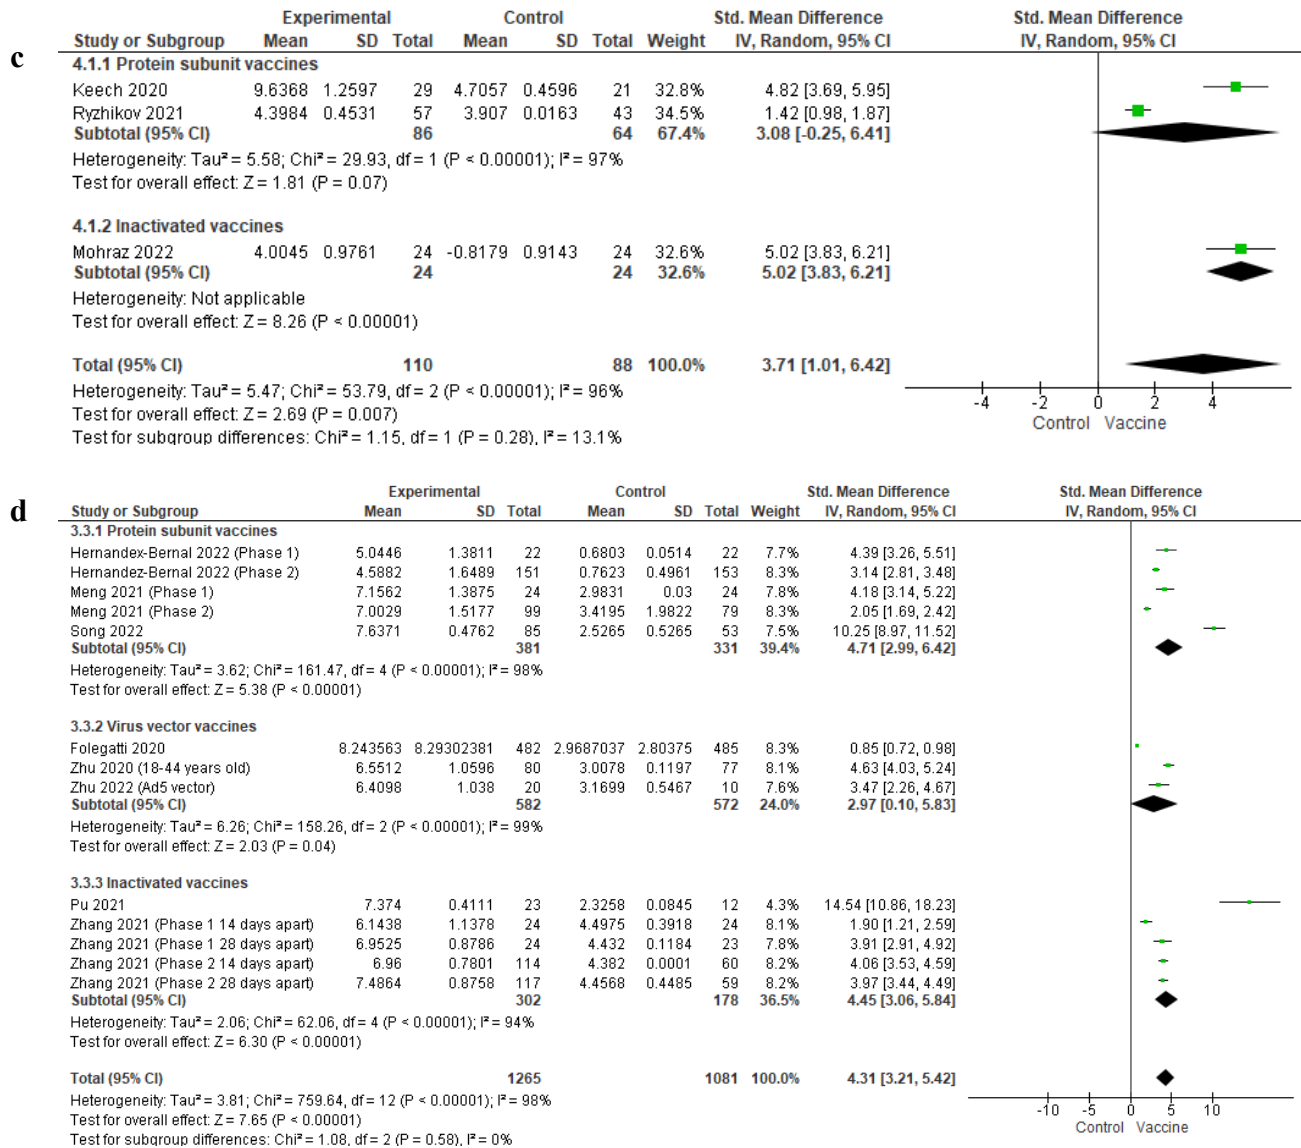

**Fig. 4**

**a**

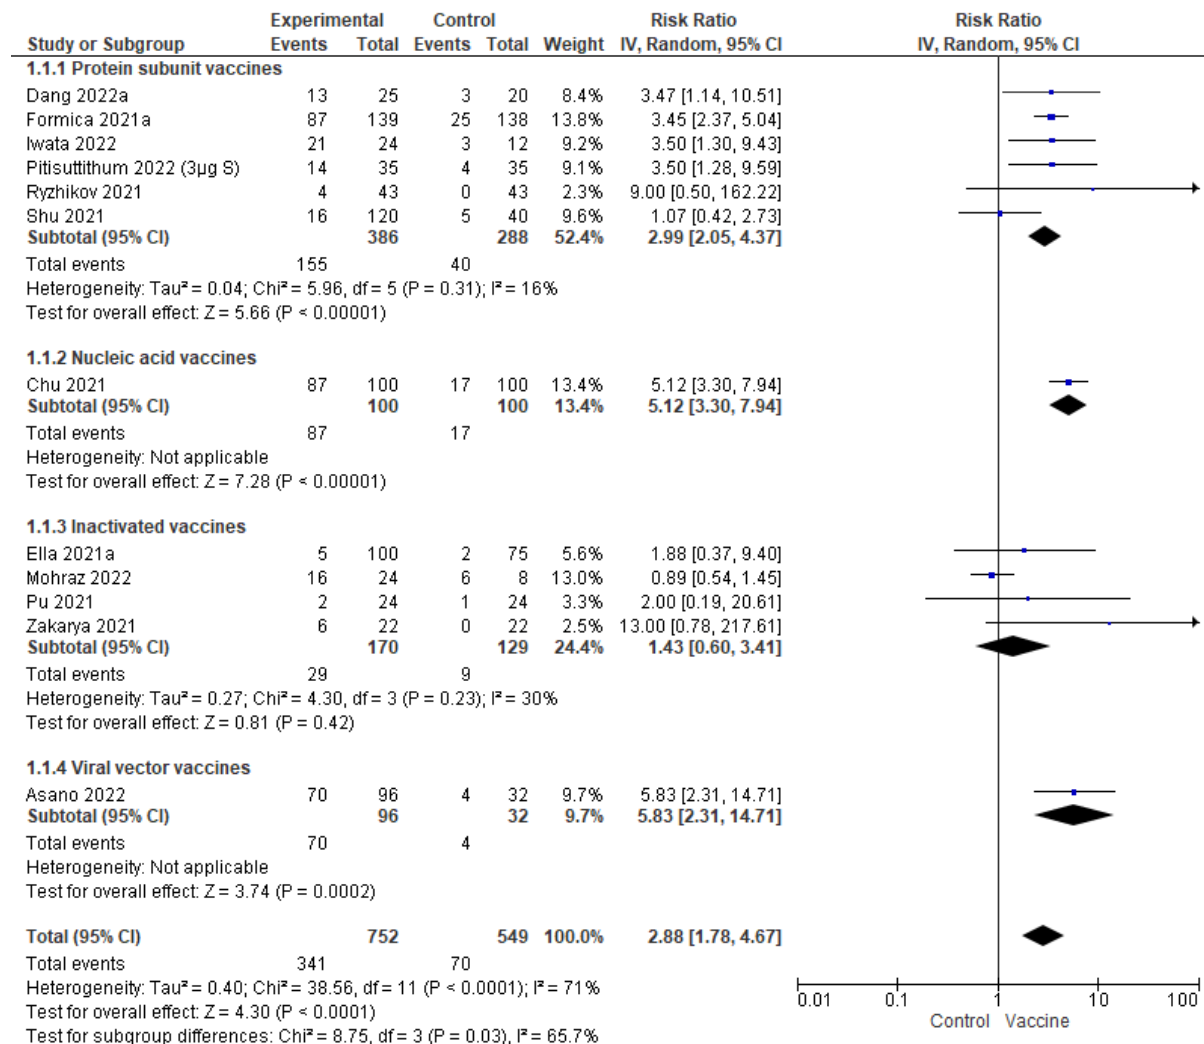



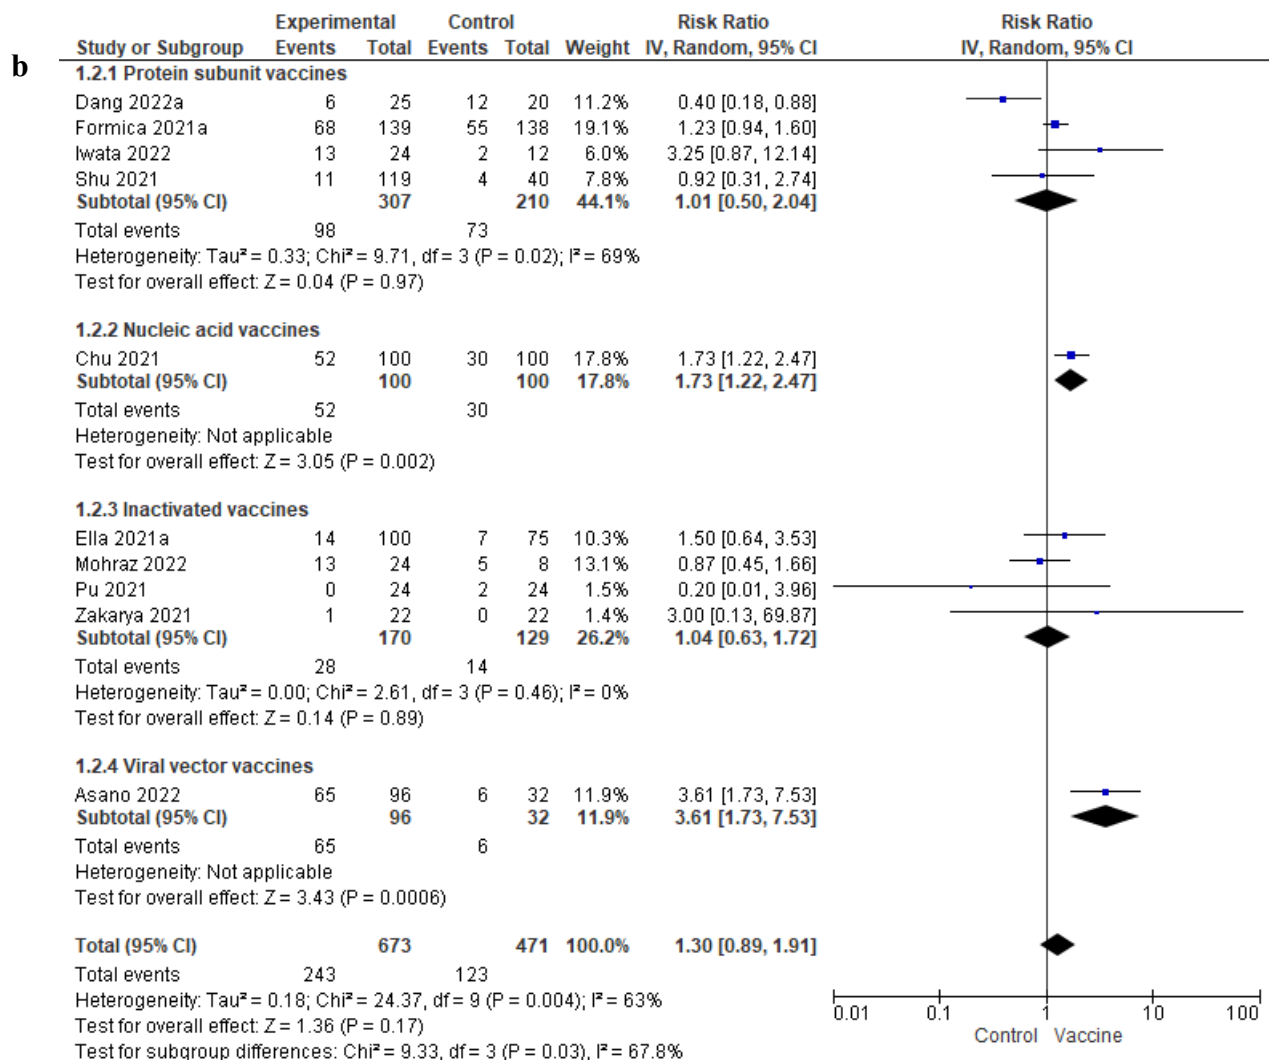

**Fig. 5**

**a**

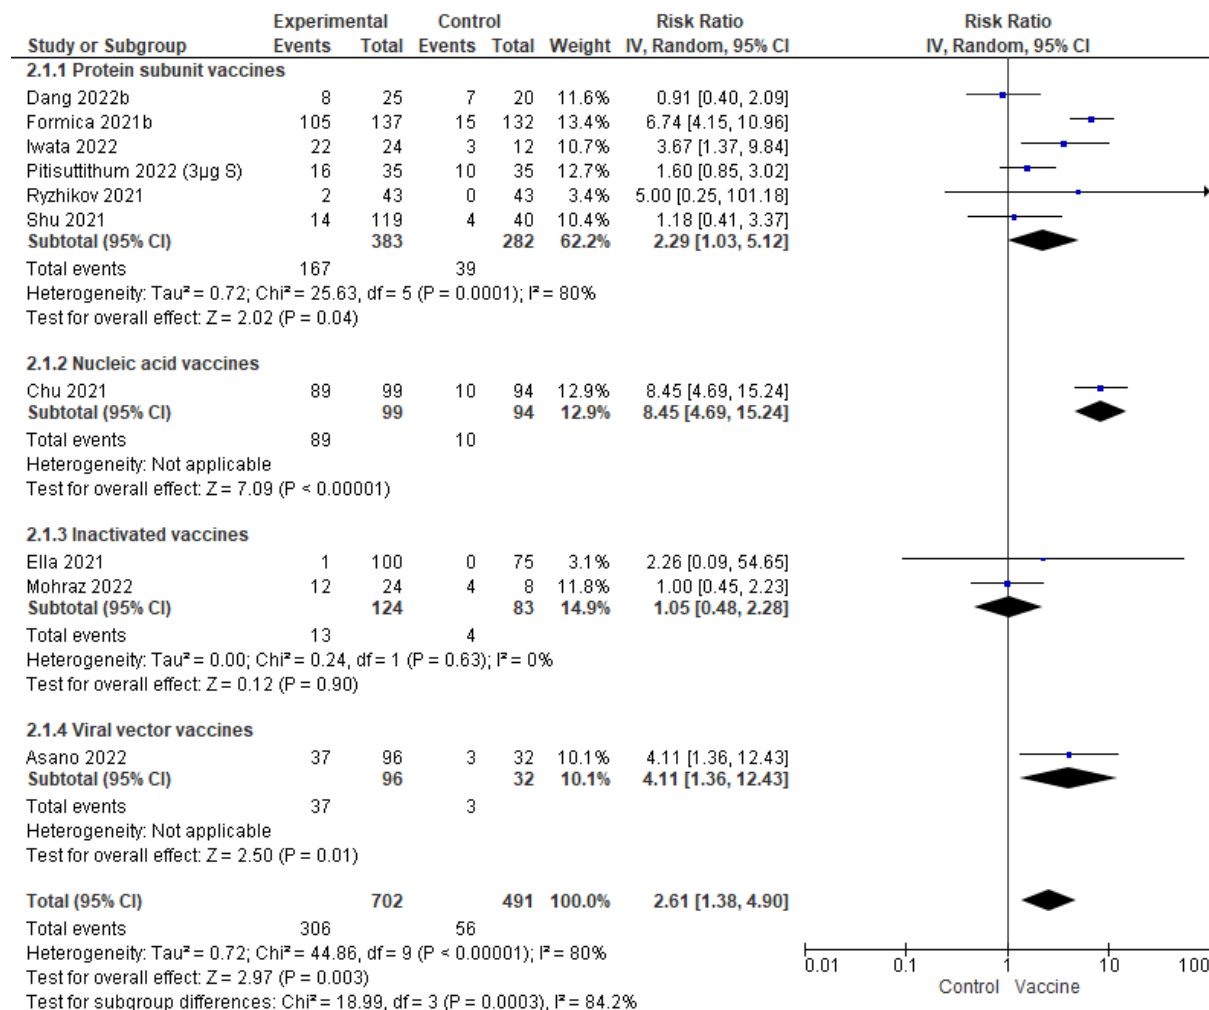

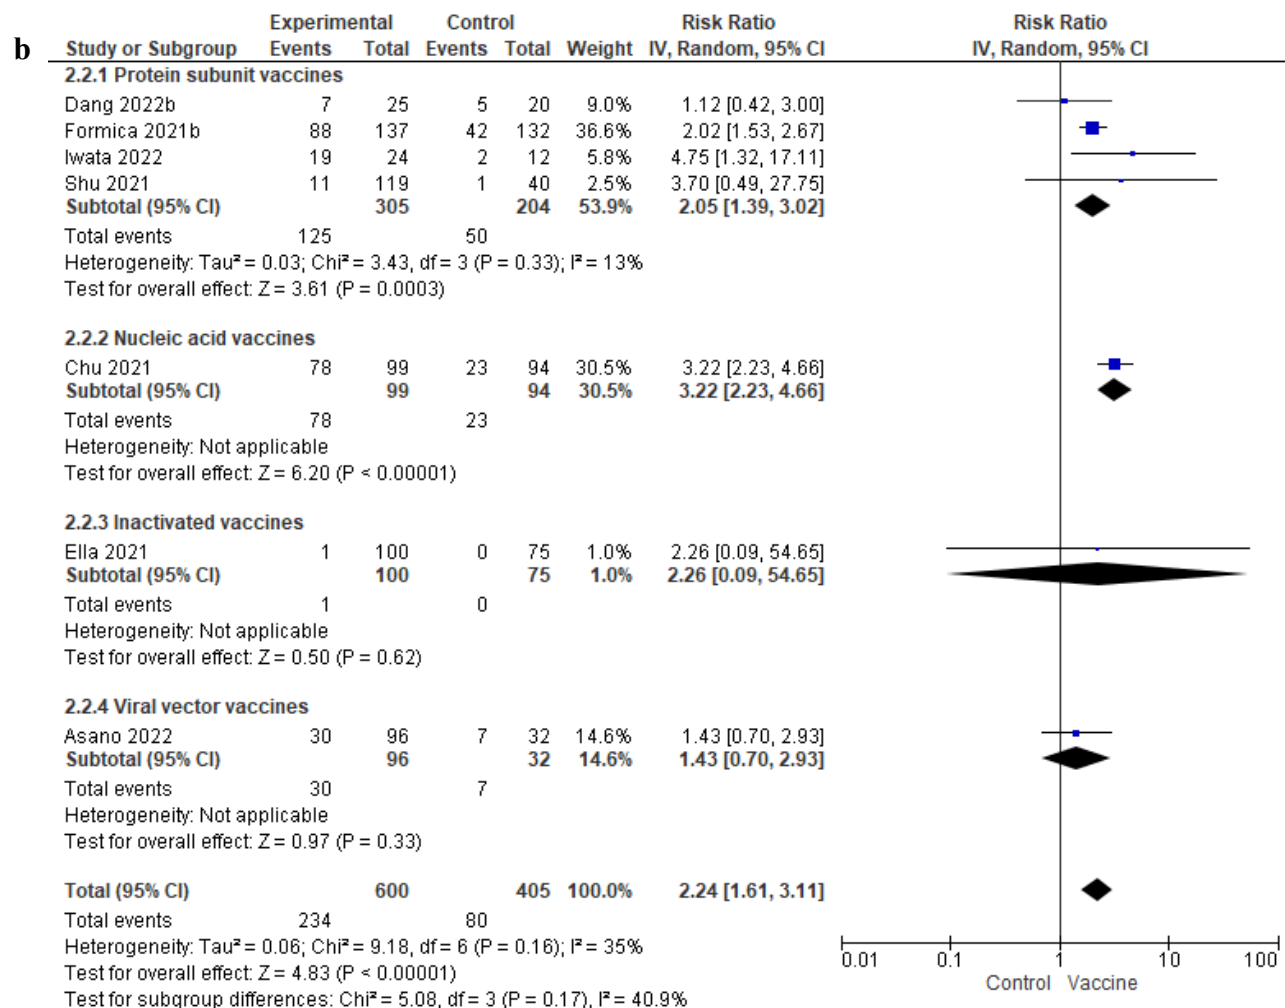

**Fig. 6**

**a**

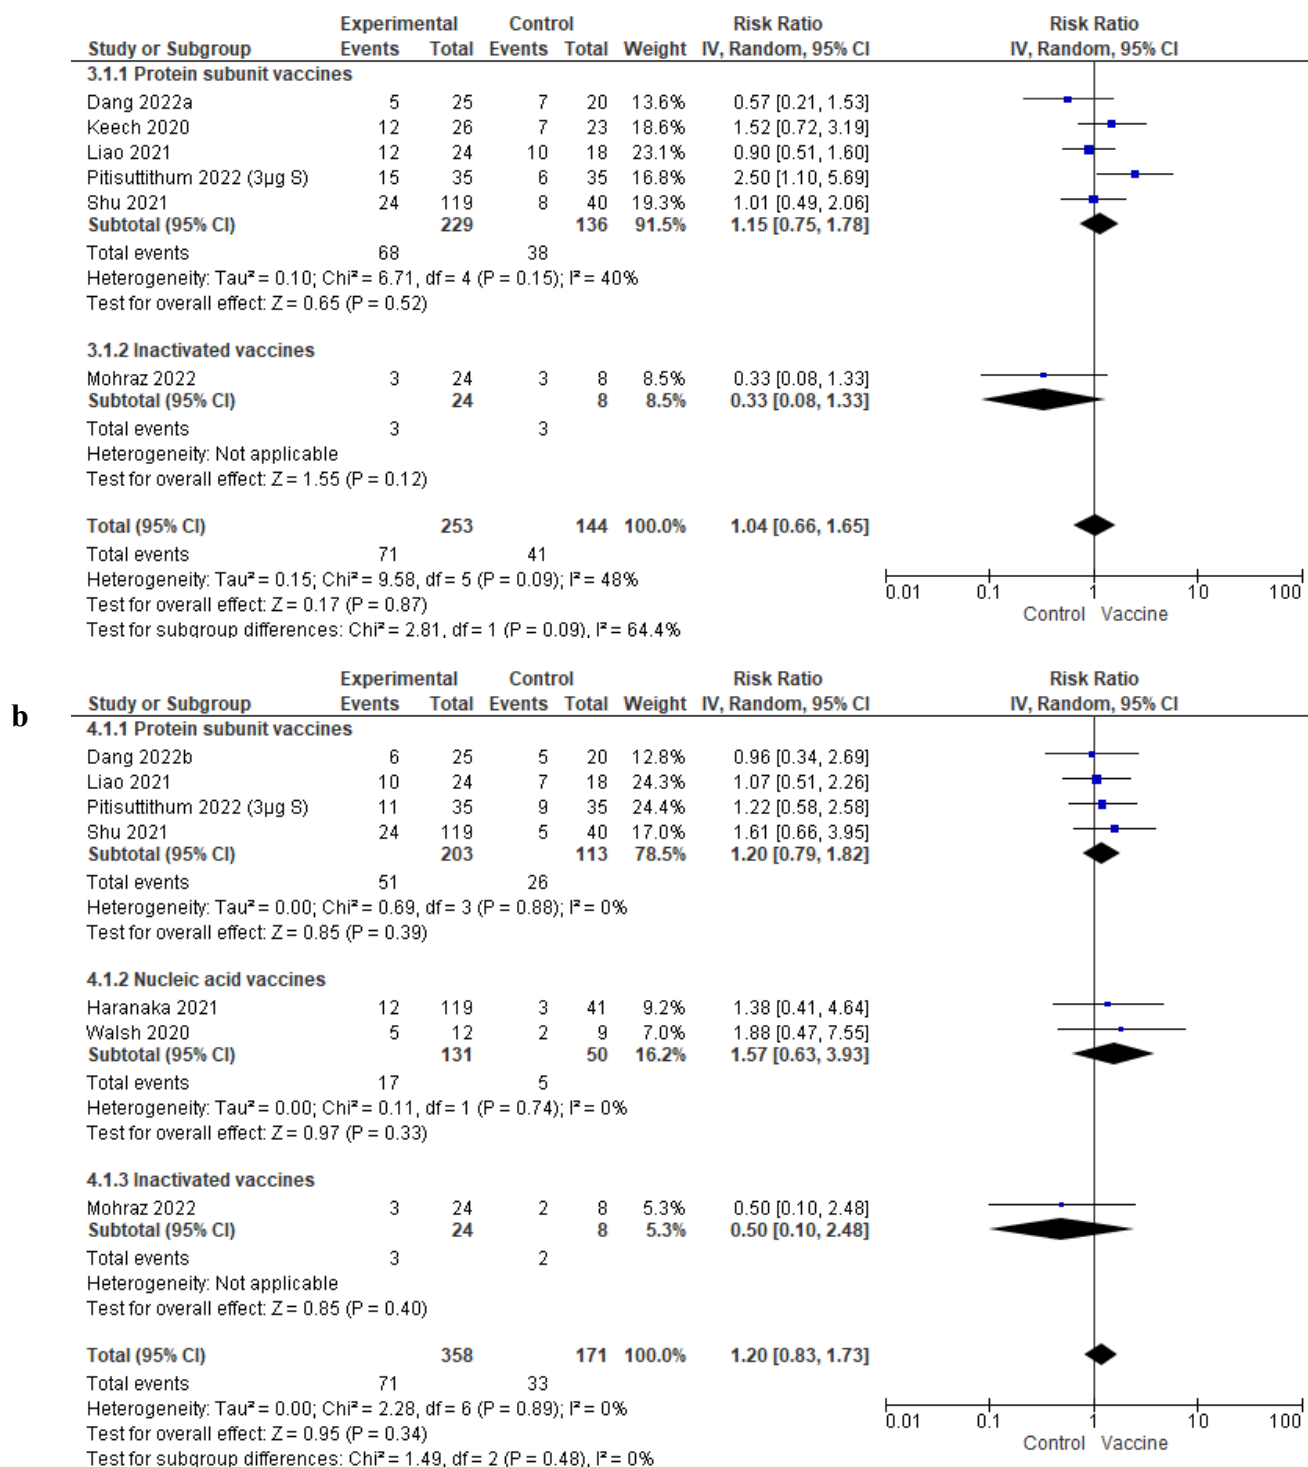

**Fig. 7**

**a**

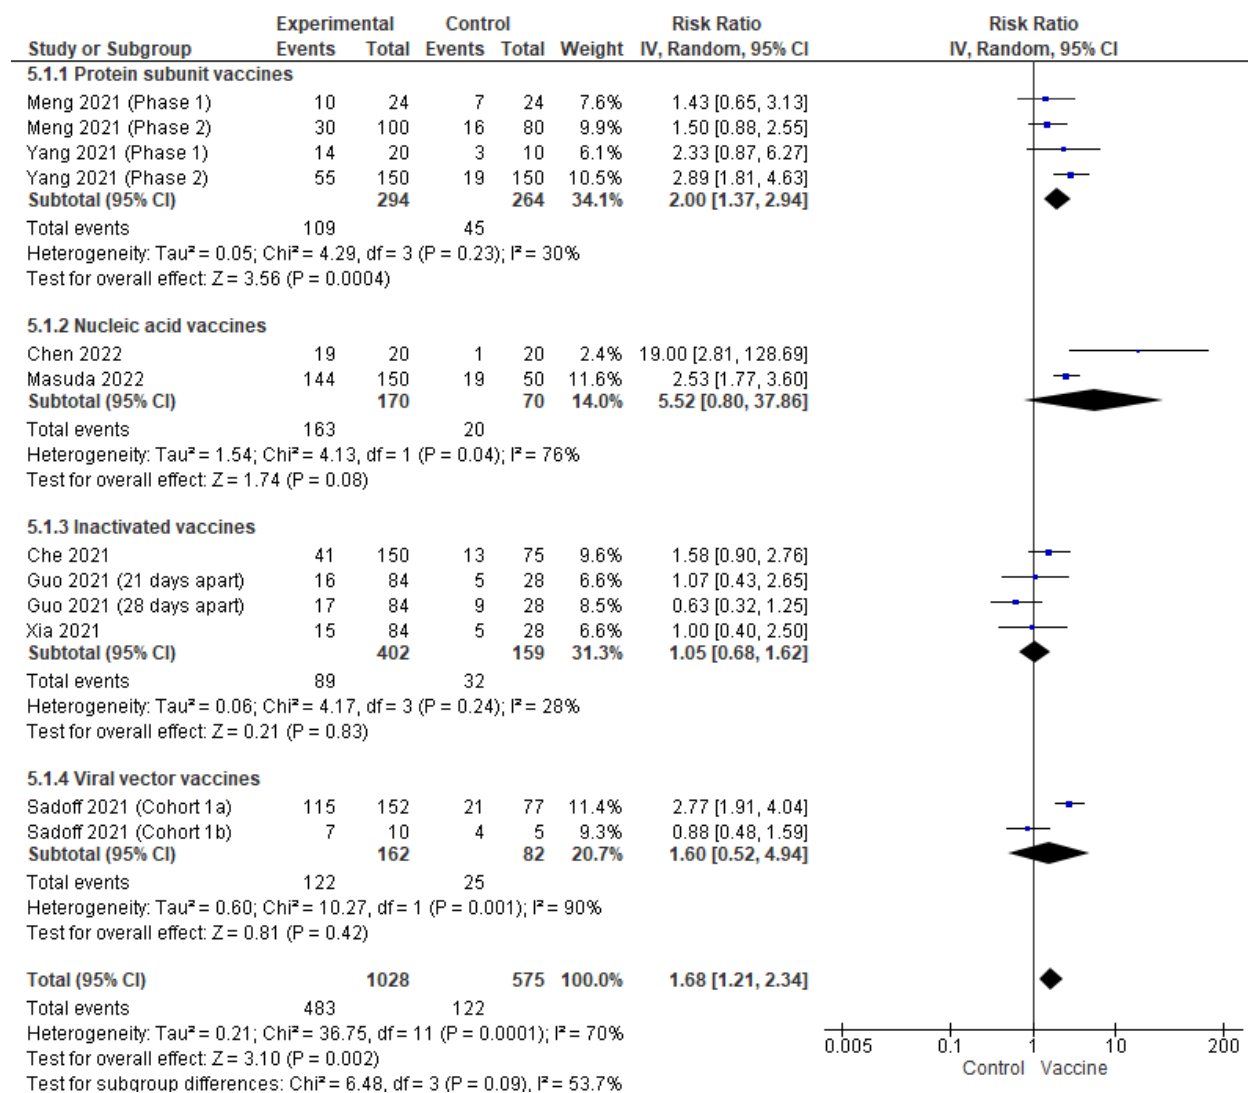

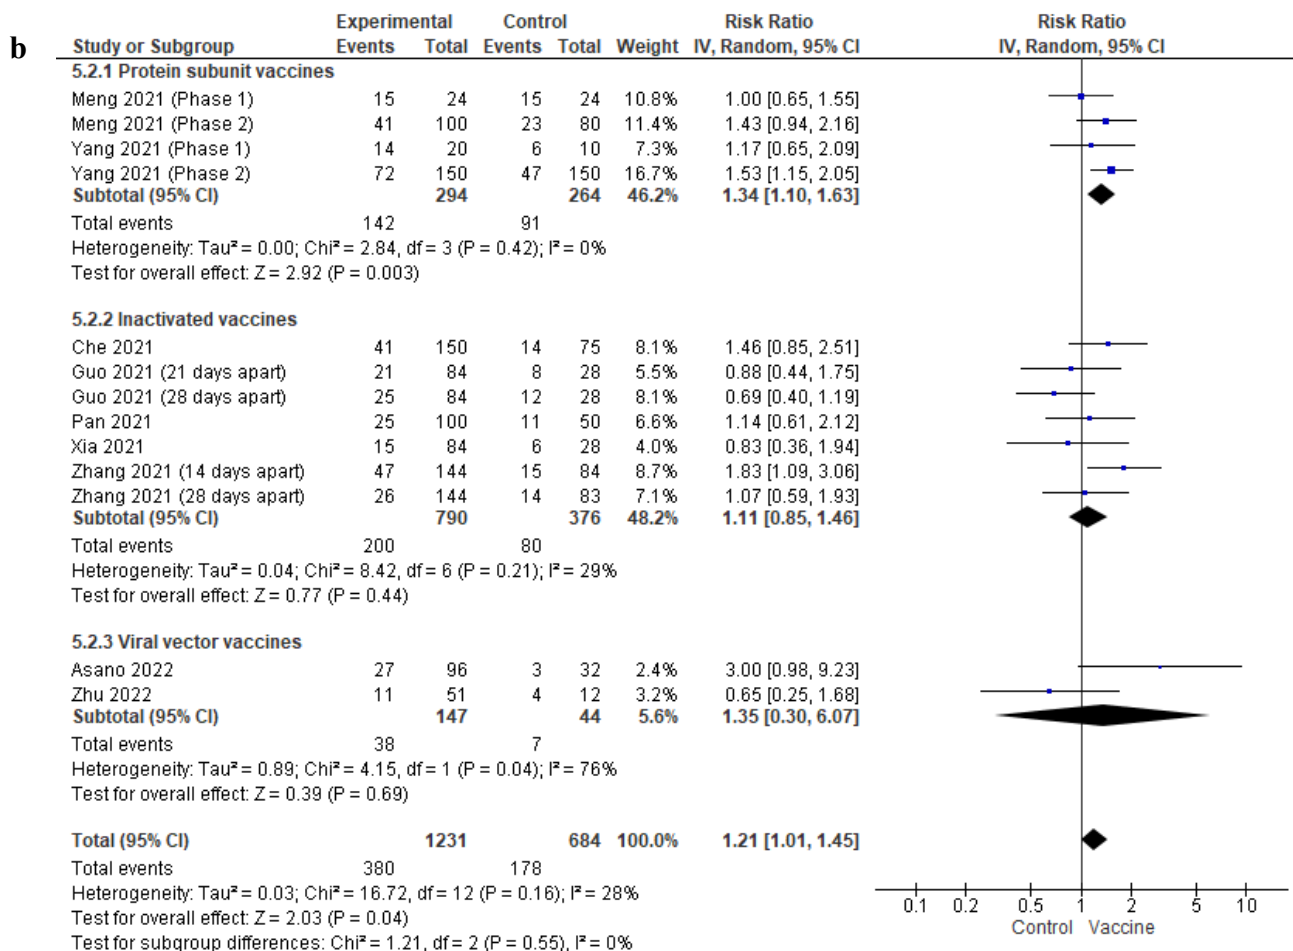

**Fig. 8**

**Figure captions**

Fig 1. PRISMA diagram showing study selection process.

Fig 2. (a) Risk of bias rating for each study and (b) risk of bias rating for each domain across all studies.

Fig. 3 (a) Forest plot for meta-analysis of log-transformed neutralising antibody levels 7 days after COVID-19 vaccination (measured using live virus neutralisation assays). (b) Forest plot for meta-analysis of log-transformed neutralising antibody levels 14 days after COVID-19 vaccination (measured using live virus neutralisation assays). (c) Forest plot for meta-analysis of log-transformed neutralising antibody levels 28 days after COVID-19 vaccination (measured

using live virus neutralisation assays). (d) Forest plot for meta-analysis of log-transformed neutralising antibody levels 28 days after COVID-19 vaccination (measured using pseudo-neutralising antibody assays)

Fig. 4 (a) Forest plot for meta-analysis of log-transformed anti-RBD IgG levels 14 days after COVID-19 vaccination. (b) Forest plot for meta-analysis of log-transformed anti-S IgG levels 14 days after COVID-19 vaccination. (c) Forest plot for meta-analysis of log-transformed anti-S IgG levels 7 days after COVID-19 vaccination. (d) Forest plot for meta-analysis of log-transformed anti-RBD IgG levels 28 days after COVID-19 vaccination

Fig. 5 (a) Forest plot for meta-analysis of local adverse events after 7 days of the first COVID-19 vaccine dose. (b) Forest plot for meta-analysis of systemic adverse events after 7 days of first COVID-19 vaccine dose.

Fig. 6 (a) Forest plot for meta-analysis of local adverse events after 7 days of the second COVID-19 vaccine dose. (b) Forest plot for meta-analysis of systemic adverse events after 7 days of the second COVID-19 vaccine dose.

Fig. 7 (a) Forest plot for meta-analysis of any adverse events after 1 month of the first COVID-19 vaccine dose. (b) Forest plot for meta-analysis of any adverse events after 1 month of the second COVID-19 vaccine dose.

Fig. 8 (a) Forest plot for meta-analysis for overall adverse events within 7 days post COVID-19 vaccination. (b) Forest plot for meta-analysis for overall adverse events within 1 month post COVID-19 vaccination
