# Supplementary material for: Comparative Immunogenicity, Safety and Efficacy Profiles of four COVID-19 Vaccine types in healthy adults: Systematic Review cum Meta-analysis of Clinical Trial data
Source: bioRxiv or medRxiv preprint supplement (doi:10.1101/2023.08.10.23293964), 2023-08-12
Supplement: Supplementary file [file media-3.pdf]

### **Supplementary File 3. Supplementary meta-analysis figures**

## **Comparative Immunogenicity, Safety and Efficacy profiles of four COVID-19 Vaccine types in healthy adults: Systematic Review cum Meta-analysis of Clinical Trial data**

Si Qi YOONG<sup>a</sup>, Priyanka BHOWMIK<sup>b</sup>, Debprasad DUTTA<sup>c,d,\*</sup>

#### **Authors Affiliations:**

#### **Authors Affiliations:**

Si Qi YOONG

<sup>a</sup> Alice Lee Centre for Nursing Studies, Yong Yoo Lin School of Medicine  
National University of Singapore, Singapore

Priyanka BHOWMIK

<sup>b</sup> Tbilisi State Medical University, Georgia

Debprasad DUTTA\*

<sup>c</sup> Mazumdar Shaw Center for Translational Research (MSCTR), Mazumdar Shaw Medical Foundation, Bangalore, India

<sup>d</sup> Institute of Infection, Veterinary and Ecological Sciences (IVES), University of Liverpool, Liverpool, UK

Email: [debductta.bio@gmail.com](mailto:debductta.bio@gmail.com)

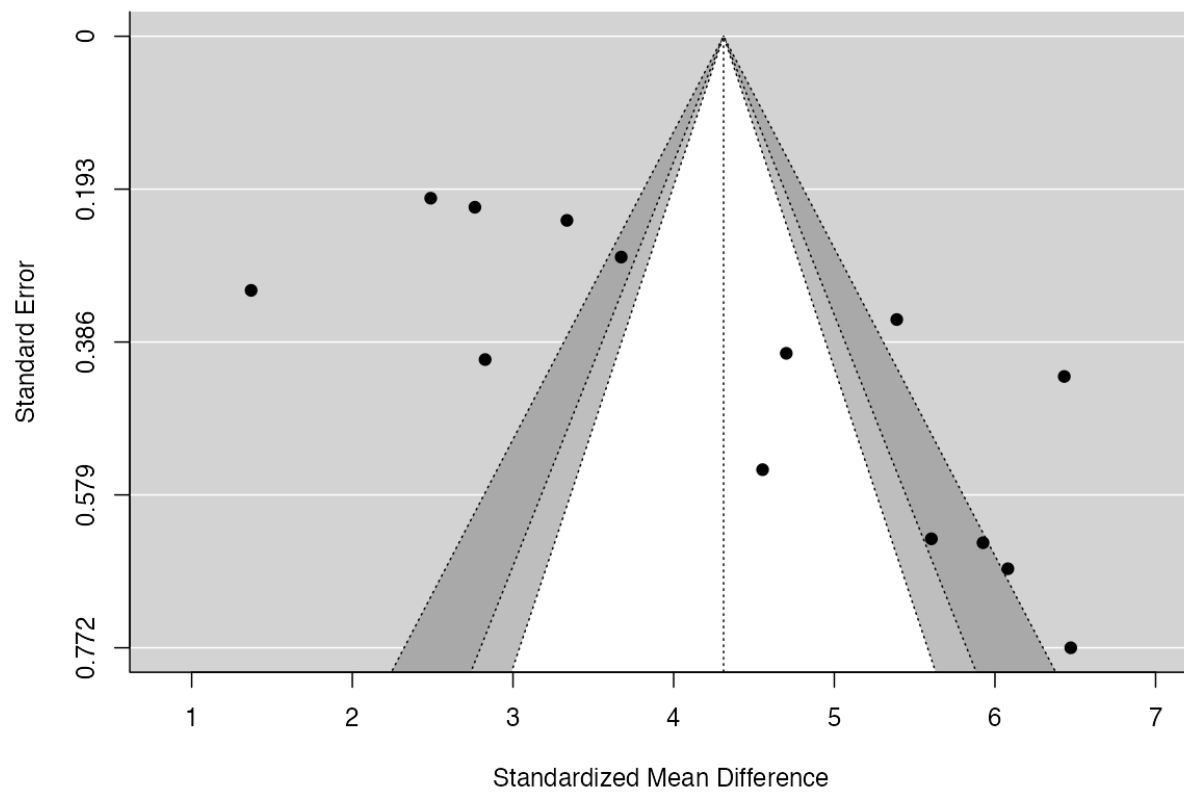

**Figure S1.** Funnel plot for publication bias assessment (with reference to Figure 3B. Log-transformed neutralizing antibody levels 14 days after COVID-19 vaccination, measured using live virus neutralization assays)

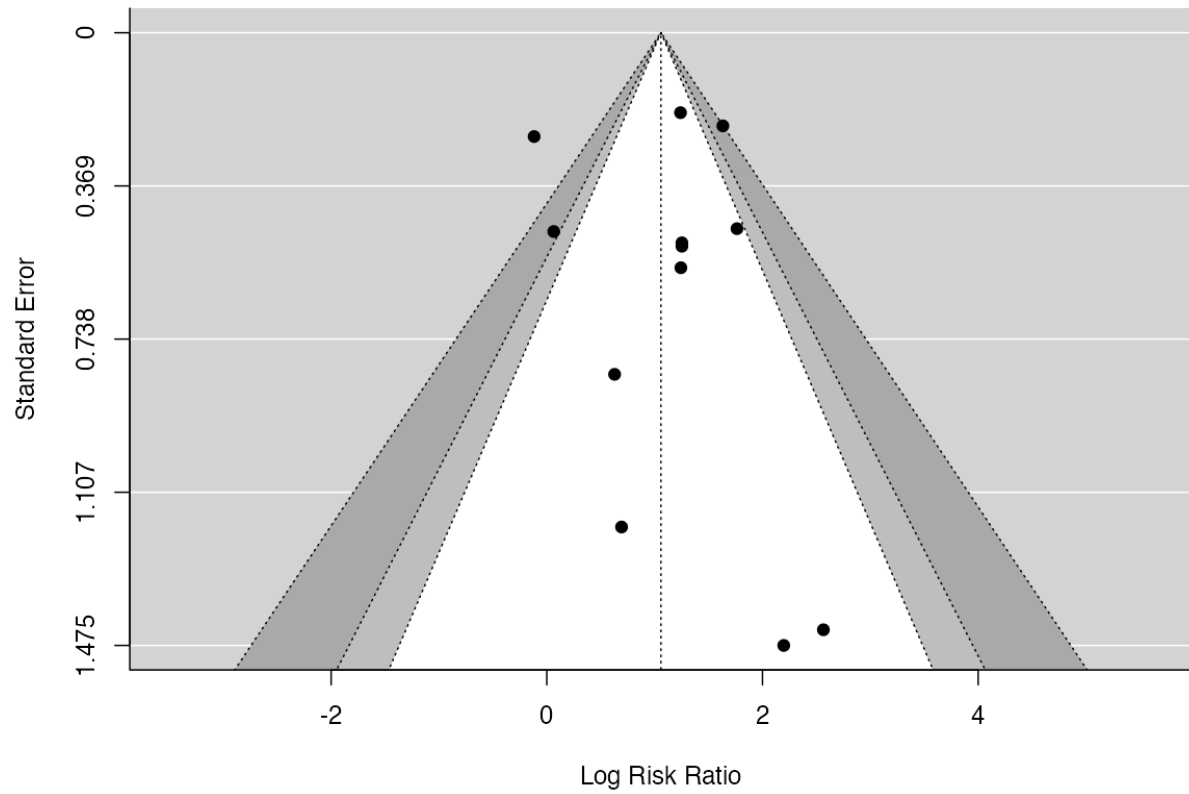

**Figure S2.** Funnel plot for publication bias assessment (with reference to Figure 5A. Local adverse events seven days after the first dose of a COVID-19 vaccine)

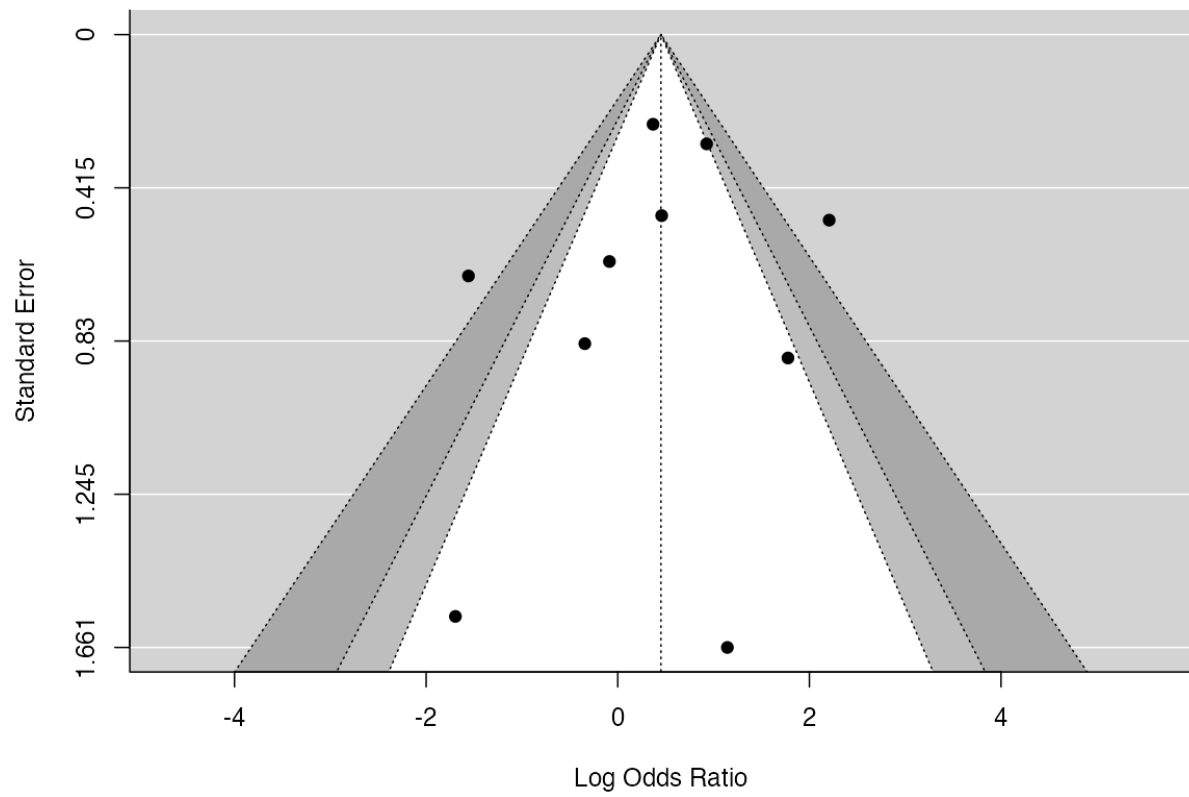

**Figure S3.** Funnel plot for publication bias assessment (with reference to Figure 5B. Systematic adverse events seven days after first dose of a COVID-19 vaccine)

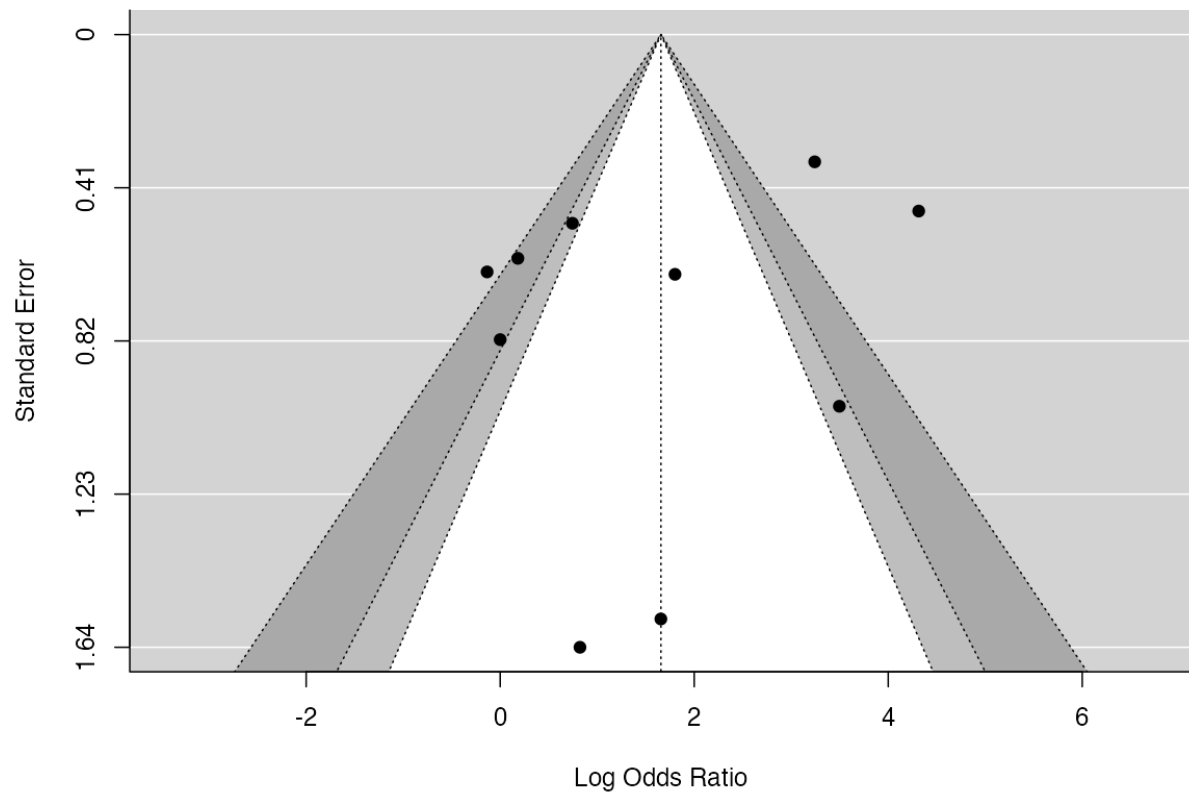

**Figure S4.** Funnel plot for publication bias assessment (with reference to Figure 6A. Local adverse events seven days after second dose of a COVID-19 vaccine)
